# Supplementary material for: Maize Feature Store: A centralized resource to manage and analyze curated maize multi-omics features for machine learning applications
Source: Oxford University Press journal article supplement (doi:10.1093/database/baad078), 2023-01-01
Supplement: baad078_supp.zip [file baad078_supp.zip]

Archive with 27 entries (27 files):
- suppl_data/Supplementary_Figure_S1.pdf
- suppl_data/Supplementary_Figure_S10.pdf
- suppl_data/Supplementary_Figure_S11.pdf
- suppl_data/Supplementary_Figure_S12.pdf
- suppl_data/Supplementary_Figure_S13.pdf
- suppl_data/Supplementary_Figure_S14.pdf
- suppl_data/Supplementary_Figure_S15.pdf
- suppl_data/Supplementary_Figure_S16.pdf
- suppl_data/Supplementary_Figure_S17.pdf
- suppl_data/Supplementary_Figure_S18.pdf
- suppl_data/Supplementary_Figure_S19_Resized.png
- suppl_data/Supplementary_Figure_S2.pdf
- suppl_data/Supplementary_Figure_S3.pdf
- suppl_data/Supplementary_Figure_S4.pdf
- suppl_data/Supplementary_Figure_S5.pdf
- suppl_data/Supplementary_Figure_S6.pdf
- suppl_data/Supplementary_Figure_S7.pdf
- suppl_data/Supplementary_Figure_S8.pdf
- suppl_data/Supplementary_Figure_S9.pdf
- suppl_data/Supplementary_Methods.docx
- suppl_data/Table_S1_Advanced_Model_Union_Features.xlsx
- suppl_data/Table_S2_Advanced _Model _Top_ 25_Features .xlsx
- suppl_data/Table_S3_Basic_Model_Top_53_B73v5_Gene_Sequence_Features.xlsx
- suppl_data/Table_S4_Final_Top_25_B73v5_Gene_Sequence_Features.xlsx
- suppl_data/Table_S5_Advanced_Model_GridSearchCV_Scores_All.xlsx
- suppl_data/Table_S6_Advanced_Model_RandomizedSearchCV_Scores_All.xlsx
- suppl_data/Table_S7_Basic_Model_RandomizedSearchCV_Scores_All.xlsx
