# Supplementary material for: Maize Feature Store: A centralized resource to manage and analyze curated maize multi-omics features for machine learning applications
Source: Oxford University Press journal article supplement (doi:10.1093/database/baad078), 2023-01-01
Supplement: baad078_supp.zip [file baad078_supp.zip › suppl_data/Supplementary_Figure_S1.pdf]

**A**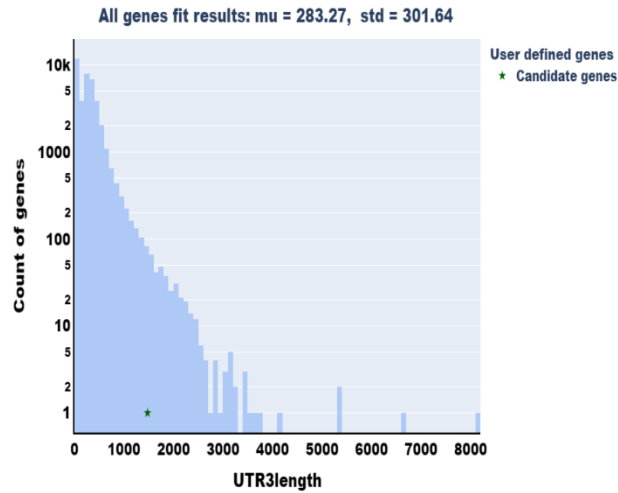**B**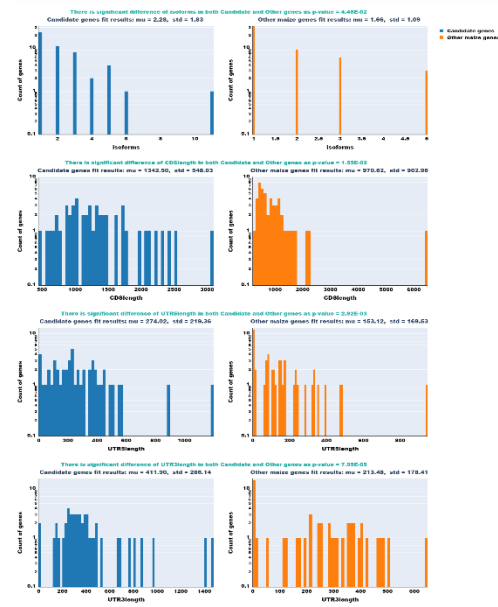

**Supplementary Figure S1.** (A,B) In Figure A and B, we display the user candidate gene analysis visualizations. (A) This figure displays a marginal plot with the histogram plot in blue showing the frequency distribution of the selected gene features (three-prime UTR length) of all maize genes along with the single candidate gene highlighted in green. This plot will enable the user to easily identify where their candidate gene lies among the other maize genes for the selected feature. (B) This is the MFS candidate gene univariate analysis in the form of histogram plot. The colors and the legends in the plot indicate the candidate genes and the downsampled other maize genes. In addition to the graph, to increase the interpretability of the data, we have also included p-values, mean and standard deviations of the selected datasets. For details on the interpretation of the plots, see ([https://mfs.maizegdb.org/user\\_Structure](https://mfs.maizegdb.org/user_Structure)).
