# Supplementary material for: Maize Feature Store: A centralized resource to manage and analyze curated maize multi-omics features for machine learning applications
Source: Oxford University Press journal article supplement (doi:10.1093/database/baad078), 2023-01-01
Supplement: baad078_supp.zip [file baad078_supp.zip › suppl_data/Supplementary_Figure_S7.pdf]

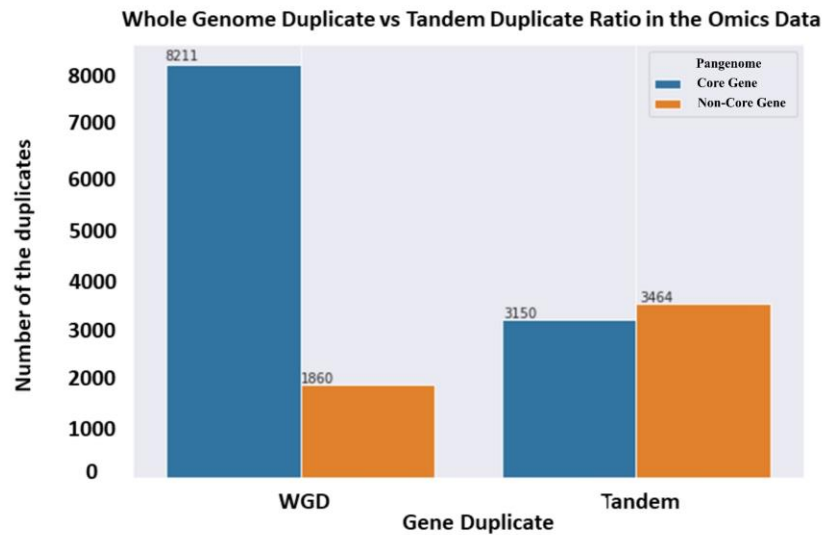

**Supplementary Figure S7.** Maize B73v5 Omics data bar plot indicating that the non-core genes have a higher tandem repeats ratio than the core genes thereby complementing the findings of previous studies on gene duplications. The y-axis displays the count of each of the duplicates (Whole Genome Duplicate or Tandem Duplicates) and the x-axis indicates type of the gene duplicates: Whole Genome Duplicate (WGD) or Tandem Duplicates. The colors and the legends in the plot indicate the “Pan-genome” categories (blue as core genes and orange as non-core genes).
