# Supplementary material for: Maize Feature Store: A centralized resource to manage and analyze curated maize multi-omics features for machine learning applications
Source: Oxford University Press journal article supplement (doi:10.1093/database/baad078), 2023-01-01
Supplement: baad078_supp.zip [file baad078_supp.zip › suppl_data/Supplementary_Figure_S8.pdf]

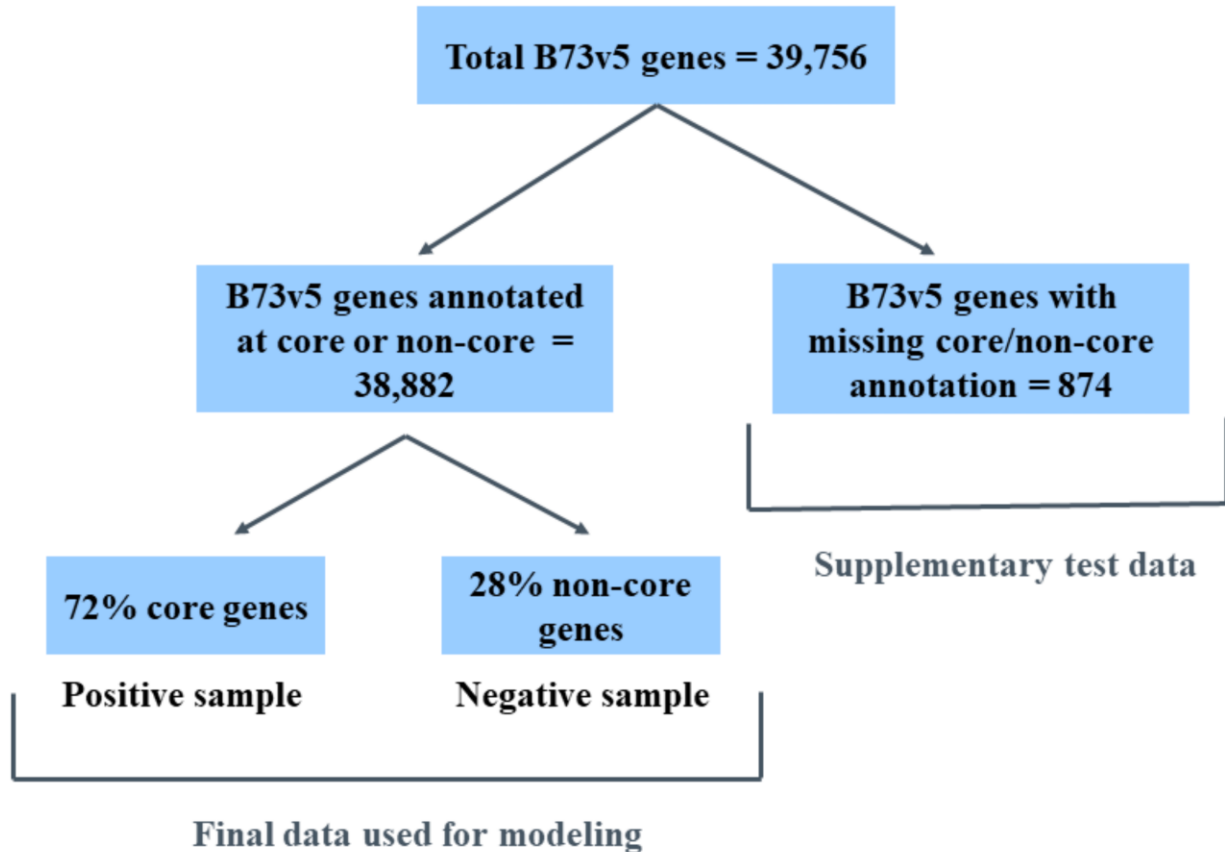

**Supplementary Figure S8.** The flow diagram here represents the distribution of the maize B73v5 genes. The initial dataset of 39,756 maize B73v5 genes had 874 missing values for the target label core/non-core, therefore the remaining dataset of 38,882 genes were used for subsequent analysis. Among the 38,882 genes, seventy-two percent of the genes marked as core in the maize reference genome version B73v5 were considered as the positive sample, and twenty-eight percent annotated as non-core (near-core, dispensable and private genes) were considered as the negative sample for modeling.
