# Supplementary material for: Maize Feature Store: A centralized resource to manage and analyze curated maize multi-omics features for machine learning applications
Source: Oxford University Press journal article supplement (doi:10.1093/database/baad078), 2023-01-01
Supplement: baad078_supp.zip [file baad078_supp.zip › suppl_data/Supplementary_Figure_S13.pdf]

A.

| Metric                   | Expression Features Model Testing Performance |                          |                        |                     |                        |                    |
|--------------------------|-----------------------------------------------|--------------------------|------------------------|---------------------|------------------------|--------------------|
|                          | Gradient Boosting Classifier                  | Random Forest Classifier | Extra Trees Classifier | Logistic Regression | Support Vector Machine | K Nearest Neighbor |
| Accuracy                 | 0.80                                          | 0.82                     | 0.82                   | 0.72                | 0.78                   | 0.74               |
| Precision                | 0.88                                          | 0.88                     | 0.88                   | 0.90                | 0.90                   | 0.88               |
| Recall                   | 0.83                                          | 0.87                     | 0.87                   | 0.70                | 0.78                   | 0.75               |
| F1                       | 0.86                                          | 0.88                     | 0.87                   | 0.78                | 0.83                   | 0.81               |
| AUC                      | 0.77                                          | 0.78                     | 0.78                   | 0.75                | 0.77                   | 0.74               |
| Average Precision-Recall | 0.90                                          | 0.91                     | 0.90                   | 0.90                | 0.90                   | 0.89               |

B.

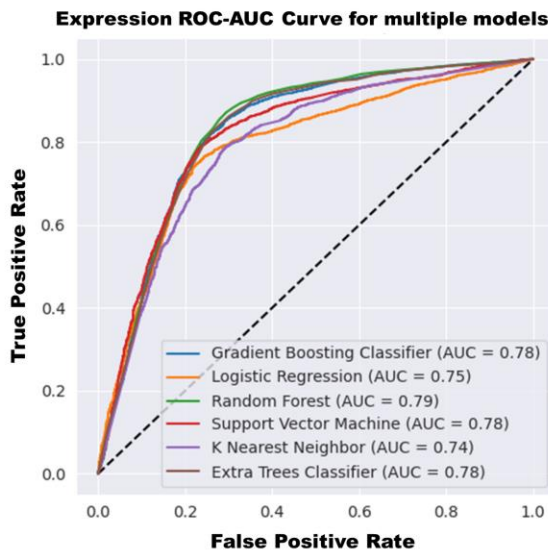

C.

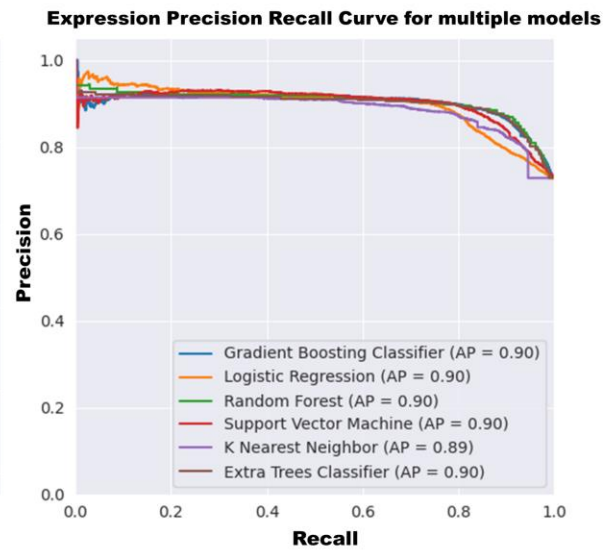

**Supplementary Figure S13.** (A) In Table A, we display the prediction performance of the models trained solely on the "Expression" feature subset. The table summarizes the algorithms' best scores on the testing dataset for each criterion (accuracy, precision, recall, F1, AUC-ROC, Average Precision-Recall). (B,C) Graphical representation of the prediction performance of the "Expression" model evaluated on the test set using AUC-ROC (left) and Precision Recall Curve PR metrics (right).
