# Supplementary material for: Maize Feature Store: A centralized resource to manage and analyze curated maize multi-omics features for machine learning applications
Source: Oxford University Press journal article supplement (doi:10.1093/database/baad078), 2023-01-01
Supplement: baad078_supp.zip [file baad078_supp.zip › suppl_data/Supplementary_Figure_S16.pdf]

A.

| Metric                          | Performance of best classifiers based on different genomic descriptors |                                           |                |                     |                     |                |                   |
|---------------------------------|------------------------------------------------------------------------|-------------------------------------------|----------------|---------------------|---------------------|----------------|-------------------|
|                                 | Advanced Model<br>(All gene Features)                                  | Basic Model<br>(Sequence +<br>Structural) | Count<br>Model | Expression<br>Model | Epigenetic<br>Model | Other<br>Model | Variomic<br>Model |
| Accuracy                        | 0.90                                                                   | 0.84                                      | 0.83           | 0.82                | 0.81                | 0.78           | 0.78              |
| Precision                       | 0.92                                                                   | 0.90                                      | 0.89           | 0.88                | 0.89                | 0.91           | 0.82              |
| Recall                          | 0.93                                                                   | 0.88                                      | 0.88           | 0.87                | 0.85                | 0.76           | 0.88              |
| F1                              | 0.93                                                                   | 0.89                                      | 0.88           | 0.88                | 0.87                | 0.83           | 0.85              |
| AUC                             | 0.87                                                                   | 0.82                                      | 0.79           | 0.78                | 0.78                | 0.78           | 0.69              |
| Average<br>Precision-<br>Recall | 0.97                                                                   | 0.93                                      | 0.90           | 0.91                | 0.90                | 0.91           | 0.86              |

**Supplementary Figure S16.** (A) In Table A, we display the prediction performance of the best performing model trained on distinct or all genomic descriptors (Advanced, Basic, Count, Expression, Epigenetic, Other and Variomic). The table summarizes the models' best scores on the testing dataset for each criterion (accuracy, precision, recall, F1, AUC-ROC, Average Precision-Recall).
