# Supplementary material for: Maize Feature Store: A centralized resource to manage and analyze curated maize multi-omics features for machine learning applications
Source: Oxford University Press journal article supplement (doi:10.1093/database/baad078), 2023-01-01
Supplement: baad078_supp.zip [file baad078_supp.zip › suppl_data/Supplementary_Figure_S17.pdf]

**A.**

| Metric                   | Advanced Model Testing Performance<br>(All Gene based Features) |                          |                        |                     |                        |                    |
|--------------------------|-----------------------------------------------------------------|--------------------------|------------------------|---------------------|------------------------|--------------------|
|                          | Gradient Boosting Classifier                                    | Random Forest Classifier | Extra Trees Classifier | Logistic Regression | Support Vector Machine | K Nearest Neighbor |
| Accuracy                 | 0.90                                                            | 0.89                     | 0.89                   | 0.84                | 0.87                   | 0.83               |
| Precision                | 0.92                                                            | 0.91                     | 0.91                   | 0.92                | 0.92                   | 0.91               |
| Recall                   | 0.93                                                            | 0.93                     | 0.93                   | 0.84                | 0.89                   | 0.84               |
| F1                       | 0.93                                                            | 0.92                     | 0.92                   | 0.88                | 0.91                   | 0.87               |
| AUC                      | 0.87                                                            | 0.86                     | 0.86                   | 0.84                | 0.85                   | 0.83               |
| Average Precision-Recall | 0.97                                                            | 0.96                     | 0.95                   | 0.94                | 0.94                   | 0.93               |

**Supplementary Figure S17.** (A) In Table A, we display the prediction performance of the "Advanced" model across all classifiers trained on the top 25 omics features identified using the hybrid feature selection technique. The table summarizes the algorithms' best scores on the testing dataset for each criterion (accuracy, precision, recall, F1, AUC-ROC, Average Precision-Recall).
