# Supplementary material for: Maize Feature Store: A centralized resource to manage and analyze curated maize multi-omics features for machine learning applications
Source: Oxford University Press journal article supplement (doi:10.1093/database/baad078), 2023-01-01
Supplement: baad078_supp.zip [file baad078_supp.zip › suppl_data/Supplementary_Figure_S18.pdf]

A.

| Metric                      | Basic Model Testing Performance<br>(Sequence + Structural Features) |                             |                           |                        |                              |                       |
|-----------------------------|---------------------------------------------------------------------|-----------------------------|---------------------------|------------------------|------------------------------|-----------------------|
|                             | Gradient Boosting<br>Classifier                                     | Random Forest<br>Classifier | Extra Trees<br>Classifier | Logistic<br>Regression | Support<br>Vector<br>Machine | K Nearest<br>Neighbor |
| Accuracy                    | 0.83                                                                | 0.84                        | 0.83                      | 0.79                   | 0.81                         | 0.76                  |
| Precision                   | 0.87                                                                | 0.90                        | 0.88                      | 0.90                   | 0.90                         | 0.89                  |
| Recall                      | 0.89                                                                | 0.88                        | 0.88                      | 0.79                   | 0.82                         | 0.76                  |
| F1                          | 0.88                                                                | 0.89                        | 0.88                      | 0.84                   | 0.86                         | 0.82                  |
| AUC                         | 0.79                                                                | 0.82                        | 0.80                      | 0.79                   | 0.80                         | 0.77                  |
| Average<br>Precision-Recall | 0.93                                                                | 0.93                        | 0.92                      | 0.91                   | 0.92                         | 0.90                  |

**Supplementary Figure S18.** (A) In Table A, we display the prediction performance of the "Basic" model across all classifiers trained on the top 25 sequence and structural features identified using the hybrid feature selection technique. The table summarizes the algorithms' best scores on the testing dataset for each criterion (accuracy, precision, recall, F1, AUC-ROC, Average Precision-Recall).
