# Supplementary material for: Maize Feature Store: A centralized resource to manage and analyze curated maize multi-omics features for machine learning applications
Source: Oxford University Press journal article supplement (doi:10.1093/database/baad078), 2023-01-01
Supplement: baad078_supp.zip [file baad078_supp.zip › suppl_data/Table_S1_Advanced_Model_Union_Features.xlsx]

## Sheet: Table_S1_Advanced_Model_Union
Table S1. Advanced model top 98 B73v5 gene features identified by means of Hybrid feature selection : "feature selection by model," and "recursive feature elimination" (RFE).
Advanced Model Union Features
dTSS_root
Subcel1_cyto
UTR3length
EREB71
LBD19
kmer_2_CC_x
Subcel2_cyto
5kb_ARF_27
gene_age
EREB_29
Kn_B73_vs_sorghum
TC_WAA
dis_to_Knob
DifferentiationZone_3d
5kb_atac_ear
chrom_chr6
Subcel2_nucl
TC_REL
1kb_EREB_138
Thirteenth_Leaf_R2
Subcel2_chlo
genebody_his_intensity_ZmMC1_H3K27ac
TC_GRR
CrownRoot_Node4_V7
DC_TP
1kb_LBD19
Subcel2_none
atac_leaf
cov_genebody_ZmMC_H3K4me3
ARF_27
Type_Soluble
dis_to_cen
TC_HEN
TC_DRH
Localization_Nucleus
TC_ASL
SNPS
Origin_Unknown
Subcel2_mito
Origin_Both
Origin_WGD
UTR5length
Ear_(E2+E3+E4+E5+E8)_Activation
ka_div_ks_plus1_y
1kb_EREB_29
Localization_Cytoplasm
1kb_atac_ear
chrom_chr2
5kb_dTSS_shoot
Leaf_E5_Activation
CTriad_VS111
1kb_atac_leaf
5kb_atac_leaf
genebody_ATAC_intensity_ZmMC
1kb_B73_UniformMu_withW22
Total_PFAM_x
gene_breadth
dis_to_telo
Localization_Mitochondrion
ka_div_ks_plus1_x
Ear_E6_Repression/Activation
Localization_Plastid
5kb_dTSS_root
Nonpollinated_leaf_30_DAP
EREB_138
B73_UniformMu_withW22
5kb_EREB_29
chrom_chr4
Subcel1_chlo
chrom_chr10
upstream_his_intensity_ZmMC1_H3K27ac
protein_breadth
CHG_pct_upstream_ZmMC
Origin_Tandem
WGCNA_Module6
chrom_chr5
chrom_chr7
TC_WDR
Ks_B73_vs_sorghum
V5_TE
Anthers_R1
1kb_ARF_34
upstream_ATAC_intensity_ZmMC
chrom_chr8
Isoforms
Subcel1_nucl
chrom_chr3
1kb_EREB71
dTSS_shoot
5kb_LBD19
Leaf_(E2+E8+E9)_Activation
Leaf_E3_Activation
atac_ear
5kb_EREB_138
Leaf_E4_Activation
avg_gene_abundance
V9_Immature_Leaves
Leaf_E1_Activation
