# Supplementary material for: Maize Feature Store: A centralized resource to manage and analyze curated maize multi-omics features for machine learning applications
Source: Oxford University Press journal article supplement (doi:10.1093/database/baad078), 2023-01-01
Supplement: baad078_supp.zip [file baad078_supp.zip › suppl_data/Table_S2_Advanced _Model _Top_ 25_Features .xlsx]

## Sheet: Table_S2_Advanced_Model_Top  
Table S2. Final top 25 B73v5 gene features used for training the advanced model. Features were identified using embedded feature selection technique of Gradient Boosting Classifier from among the 98 features obtained via Hybrid feature selection.
Advanced Model Top 25 Features
ka_div_ks_plus1_x
EREB_138
Total_PFAM_x
ka_div_ks_plus1_y
Origin_Tandem
Ear_E6_Repression/Activation
dTSS_root
dis_to_Knob
Ks_B73_vs_sorghum
V5_TE
UTR3length
TC_WDR
TC_HEN
TC_WAA
chrom_chr10
SNPS
1kb_EREB_29
TC_GRR
dTSS_shoot
gene_breadth
dis_to_cen
Leaf_E1_Activation
1kb_ARF_34
1kb_EREB_138
LBD19
