# Supplementary material for: Maize Feature Store: A centralized resource to manage and analyze curated maize multi-omics features for machine learning applications
Source: Oxford University Press journal article supplement (doi:10.1093/database/baad078), 2023-01-01
Supplement: baad078_supp.zip [file baad078_supp.zip › suppl_data/Table_S3_Basic_Model_Top_53_B73v5_Gene_Sequence_Features.xlsx]

## Sheet: Table_S3_Basic_Model_Top_53
Table S3. Basic model top 53 B73v5 gene sequence features identified by means of Hybrid feature selection : "feature selection by model," and "recursive feature elimination" (RFE).
Advanced Model Union Features
QSO_Grantham_Xd_1
TC_LPL
Localization_Nucleus
isoforms
TC_SAL
Subcel1_cyto
distance
Flanking_quad
CTriad_VS111
TC_RSA
CTDD_prop7_G3_residue0
PseDNC_Xc1_GG
PseDNC_Xc1_AT
TC_DSL
avgExonLength
Subcel2_none
Localization_Mitochondrion
PAAC_Xc1_A
Type_Soluble
PseKNC_3_Xc1_TGT
TC_RAS
TC_ARG
PseKNC_3_Xc1_ACG
UTR5length
CTDD_prop2_G3_residue0
TC_RSS
Subcel1_nucl
Subcel2_cyto
Subcel2_chlo
Subcel2_nucl
Localization_Extracellular
CTDD_prop7_G1_residue0
Subcel1_mito
TC_IAK
TC_PAP
mRNAlength
TC_VVA
QSO_Schneider_Xd_28
Subcel2_mito
Subcel1_chlo
PAAC_Xc1_P
Localization_Cytoplasm
Subcel1_plas
TC_TKI
CTDD_prop1_G2_residue0
PseKNC_3_Xc1_TAG
Subcel2_vacu
CTDD_prop6_G3_residue0
CTDD_prop1_G3_residue0
Localization_Plastid
CTDD_prop5_G2_residue0
UTR3length
CTDD_prop1_G1_residue0
