# Supplementary material for: Maize Feature Store: A centralized resource to manage and analyze curated maize multi-omics features for machine learning applications
Source: Oxford University Press journal article supplement (doi:10.1093/database/baad078), 2023-01-01
Supplement: baad078_supp.zip [file baad078_supp.zip › suppl_data/Table_S4_Final_Top_25_B73v5_Gene_Sequence_Features.xlsx]

## Sheet: Table_S4_Final_Top 25_Seq
Table S4. Final top 25 B73v5 gene sequence features used for training the basic model. Features were identified using embedded feature selection technique of Gradient Boosting Classifier from among the 54 features obtained via Hybrid feature selection.
Basic Model Top 25 Features
UTR3length
isoforms
UTR5length
distance
CTDD_prop7_G3_residue0
PseDNC_Xc1_AT
CTDD_prop1_G2_residue0
PseKNC_3_Xc1_ACG
avgExonLength
TC_SAL
PseDNC_Xc1_GG
PseKNC_3_Xc1_TAG
CTDD_prop5_G2_residue0
TC_PAP
mRNAlength
CTDD_prop2_G3_residue0
TC_LPL
TC_RSA
PAAC_Xc1_A
CTriad_VS111
CTDD_prop7_G1_residue0
PAAC_Xc1_P
TC_VVA
PseKNC_3_Xc1_TGT
TC_ARG
