# Supplementary material for: Maize Feature Store: A centralized resource to manage and analyze curated maize multi-omics features for machine learning applications
Source: Oxford University Press journal article supplement (doi:10.1093/database/baad078), 2023-01-01
Supplement: baad078_supp.zip [file baad078_supp.zip › suppl_data/Table_S5_Advanced_Model_GridSearchCV_Scores_All.xlsx]

## Sheet: Table_S5_advanced_model_grid_sc
Table S5. Hyperparameter tuning of six different models (1. Logistic Regression, 2. Random Forest Classifier, 3. Gradient Boosting Classifier, 4. Extra Trees Classifier, 5. KNeighborsClassifier, and 6. SVM Classifier) using the Scikit-Learns GridSearchCV optimization technique. The table summarizes the algorithms' highest mean scores for each criterion (accuracy, average precision, f1, precision,…
estimator	min_score	mean_score	max_score	std_score	C	penalty	solver	n_estimators	learning_rate	n_neighbors	weights	gamma	kernel	scoring_name
ExtraTreesClassifier	0.845735	0.916681	0.961128	0.0522888	None	None	None	32	None	None	None	None	None	accuracy
RandomForestClassifier	0.83263	0.912239	0.960573	0.0580224	None	None	None	32	None	None	None	None	None	accuracy
GradientBoostingClassifier	0.839849	0.913216	0.958241	0.0536627	None	None	None	32	0.8	None	None	None	None	accuracy
RandomForestClassifier	0.837072	0.910151	0.956797	0.0546189	None	None	None	16	None	None	None	None	None	accuracy
ExtraTreesClassifier	0.846735	0.913838	0.955575	0.0491189	None	None	None	16	None	None	None	None	None	accuracy
GradientBoostingClassifier	0.834629	0.91004	0.955464	0.0551928	None	None	None	32	1	None	None	None	None	accuracy
GradientBoostingClassifier	0.83163	0.907419	0.954798	0.0557202	None	None	None	16	0.8	None	None	None	None	accuracy
GradientBoostingClassifier	0.833296	0.907996	0.954576	0.0545462	None	None	None	16	1	None	None	None	None	accuracy
KNeighbors Classifier	0.842626	0.88183	0.908374	0.0307679	None	None	None	None	None	6	distance	None	None	accuracy
KNeighbors Classifier	0.844625	0.880786	0.907263	0.0281649	None	None	None	None	None	10	distance	None	None	accuracy
KNeighbors Classifier	0.841404	0.880076	0.906153	0.03042	None	None	None	None	None	5	distance	None	None	accuracy
KNeighbors Classifier	0.843181	0.880897	0.905264	0.0288887	None	None	None	None	None	7	distance	None	None	accuracy
KNeighbors Classifier	0.825411	0.867703	0.898601	0.0343859	None	None	None	None	None	2	distance	None	None	accuracy
KNeighbors Classifier	0.825411	0.867703	0.898601	0.0343859	None	None	None	None	None	1	distance	None	None	accuracy
KNeighbors Classifier	0.825411	0.867703	0.898601	0.0343859	None	None	None	None	None	1	uniform	None	None	accuracy
KNeighbors Classifier	0.826522	0.868192	0.895269	0.031736	None	None	None	None	None	5	uniform	None	None	accuracy
KNeighbors Classifier	0.827632	0.867392	0.892603	0.0299565	None	None	None	None	None	7	uniform	None	None	accuracy
KNeighbors Classifier	0.827077	0.862839	0.884829	0.0258184	None	None	None	None	None	10	uniform	None	None	accuracy
KNeighbors Classifier	0.826188	0.861506	0.883163	0.0254132	None	None	None	None	None	6	uniform	None	None	accuracy
SVC	0.813749	0.842315	0.861839	0.0213453	10	None	None	None	None	None	None	0.001	rbf	accuracy
KNeighbors Classifier	0.819191	0.84056	0.85673	0.0160755	None	None	None	None	None	2	uniform	None	None	accuracy
Logistic Regression	0.811528	0.831741	0.844736	0.0143257	166.81	l2	liblinear	None	None	None	None	None	None	accuracy
Logistic Regression	0.811528	0.831741	0.844736	0.0143257	7.74264	l2	liblinear	None	None	None	None	None	None	accuracy
Logistic Regression	0.811528	0.831808	0.844736	0.0142585	2.78256	l2	liblinear	None	None	None	None	None	None	accuracy
Logistic Regression	0.811528	0.831741	0.844736	0.0143257	21.5443	l2	liblinear	None	None	None	None	None	None	accuracy
Logistic Regression	0.811639	0.831875	0.844736	0.0141819	1	l2	liblinear	None	None	None	None	None	None	accuracy
Logistic Regression	0.811417	0.831675	0.844736	0.0144022	464.159	l1	liblinear	None	None	None	None	None	None	accuracy
Logistic Regression	0.811528	0.831741	0.844736	0.0143257	59.9484	l2	liblinear	None	None	None	None	None	None	accuracy
Logistic Regression	0.811528	0.831741	0.844736	0.0143257	10000	l2	liblinear	None	None	None	None	None	None	accuracy
Logistic Regression	0.811639	0.831764	0.844736	0.0142944	10000	l1	liblinear	None	None	None	None	None	None	accuracy
Logistic Regression	0.811528	0.831741	0.844736	0.0143257	1291.55	l2	liblinear	None	None	None	None	None	None	accuracy
Logistic Regression	0.811528	0.831741	0.844736	0.0143257	1291.55	l1	liblinear	None	None	None	None	None	None	accuracy
Logistic Regression	0.811528	0.831741	0.844736	0.0143257	464.159	l2	liblinear	None	None	None	None	None	None	accuracy
Logistic Regression	0.811528	0.831741	0.844736	0.0143257	3593.81	l2	liblinear	None	None	None	None	None	None	accuracy
Logistic Regression	0.81175	0.831786	0.844625	0.0141813	1	l1	liblinear	None	None	None	None	None	None	accuracy
Logistic Regression	0.811528	0.831719	0.844625	0.0143056	166.81	l1	liblinear	None	None	None	None	None	None	accuracy
Logistic Regression	0.811639	0.831741	0.844625	0.0142743	7.74264	l1	liblinear	None	None	None	None	None	None	accuracy
Logistic Regression	0.811639	0.831719	0.844625	0.0142577	2.78256	l1	liblinear	None	None	None	None	None	None	accuracy
Logistic Regression	0.811639	0.831697	0.844514	0.0142377	3593.81	l1	liblinear	None	None	None	None	None	None	accuracy
Logistic Regression	0.811528	0.831697	0.844514	0.0142856	59.9484	l1	liblinear	None	None	None	None	None	None	accuracy
Logistic Regression	0.811528	0.831653	0.844514	0.0143309	21.5443	l1	liblinear	None	None	None	None	None	None	accuracy
SVC	0.815526	0.833785	0.843625	0.0108315	1	None	None	None	None	None	None	0.001	rbf	accuracy
SVC	0.80442	0.826011	0.841293	0.0155068	1	None	None	None	None	None	None	0.001	linear	accuracy
SVC	0.80442	0.826011	0.841293	0.0155068	1	None	None	None	None	None	None	0.0001	linear	accuracy
SVC	0.80442	0.825988	0.841071	0.0154779	10	None	None	None	None	None	None	0.001	linear	accuracy
SVC	0.80442	0.825988	0.841071	0.0154779	10	None	None	None	None	None	None	0.0001	linear	accuracy
SVC	0.815971	0.831319	0.840071	0.00939018	10	None	None	None	None	None	None	0.0001	rbf	accuracy
SVC	0.809529	0.814705	0.818858	0.00304528	1	None	None	None	None	None	None	0.0001	rbf	accuracy
ExtraTreesClassifier	0.788837	0.915838	0.996188	0.0960756	None	None	None	32	None	None	None	None	None	precision
RandomForestClassifier	0.773918	0.907174	0.994225	0.101999	None	None	None	16	None	None	None	None	None	precision
ExtraTreesClassifier	0.790268	0.916673	0.993739	0.0939046	None	None	None	16	None	None	None	None	None	precision
RandomForestClassifier	0.772095	0.907177	0.992876	0.102197	None	None	None	32	None	None	None	None	None	precision
GradientBoostingClassifier	0.78125	0.910833	0.99283	0.0980149	None	None	None	32	0.8	None	None	None	None	precision
GradientBoostingClassifier	0.776169	0.908698	0.992783	0.100394	None	None	None	32	1	None	None	None	None	precision
GradientBoostingClassifier	0.771652	0.905459	0.990184	0.101427	None	None	None	16	0.8	None	None	None	None	precision
GradientBoostingClassifier	0.774465	0.906074	0.986098	0.0979909	None	None	None	16	1	None	None	None	None	precision
KNeighbors Classifier	0.868641	0.938603	0.984027	0.055109	None	None	None	None	None	2	uniform	None	None	precision
KNeighbors Classifier	0.806519	0.898722	0.961528	0.0739946	None	None	None	None	None	2	distance	None	None	precision
KNeighbors Classifier	0.806519	0.898722	0.961528	0.0739946	None	None	None	None	None	1	distance	None	None	precision
KNeighbors Classifier	0.806519	0.898722	0.961528	0.0739946	None	None	None	None	None	1	uniform	None	None	precision
KNeighbors Classifier	0.821555	0.900351	0.950888	0.0614528	None	None	None	None	None	6	distance	None	None	precision
KNeighbors Classifier	0.822628	0.899975	0.949815	0.0607182	None	None	None	None	None	5	distance	None	None	precision
KNeighbors Classifier	0.822952	0.896869	0.944526	0.0572478	None	None	None	None	None	7	distance	None	None	precision
KNeighbors Classifier	0.822818	0.89639	0.943673	0.0543556	None	None	None	None	None	6	uniform	None	None	precision
KNeighbors Classifier	0.823027	0.893765	0.940851	0.0551656	None	None	None	None	None	10	distance	None	None	precision
KNeighbors Classifier	0.801106	0.880036	0.931813	0.060399	None	None	None	None	None	5	uniform	None	None	precision
KNeighbors Classifier	0.814167	0.882599	0.925844	0.0513619	None	None	None	None	None	10	uniform	None	None	precision
KNeighbors Classifier	0.801636	0.874636	0.921938	0.0557375	None	None	None	None	None	7	uniform	None	None	precision
SVC	0.781431	0.824496	0.855988	0.0341031	10	None	None	None	None	None	None	0.001	rbf	precision
Logistic Regression	0.795287	0.827957	0.8528	0.0254247	1	l1	liblinear	None	None	None	None	None	None	precision
Logistic Regression	0.795077	0.827895	0.8528	0.0255743	10000	l2	liblinear	None	None	None	None	None	None	precision
Logistic Regression	0.794953	0.82777	0.8528	0.0255653	166.81	l1	liblinear	None	None	None	None	None	None	precision
Logistic Regression	0.79512	0.827858	0.8528	0.0255298	2.78256	l1	liblinear	None	None	None	None	None	None	precision
Logistic Regression	0.794953	0.82797	0.8528	0.0254913	2.78256	l2	liblinear	None	None	None	None	None	None	precision
Logistic Regression	0.79512	0.827896	0.8528	0.0255583	7.74264	l1	liblinear	None	None	None	None	None	None	precision
Logistic Regression	0.795077	0.827895	0.8528	0.0255743	7.74264	l2	liblinear	None	None	None	None	None	None	precision
Logistic Regression	0.79512	0.82788	0.8528	0.0255778	21.5443	l1	liblinear	None	None	None	None	None	None	precision
Logistic Regression	0.79512	0.827886	0.8528	0.0255827	10000	l1	liblinear	None	None	None	None	None	None	precision
Logistic Regression	0.795077	0.82784	0.8528	0.0255652	59.9484	l1	liblinear	None	None	None	None	None	None	precision
Logistic Regression	0.795077	0.827895	0.8528	0.0255743	59.9484	l2	liblinear	None	None	None	None	None	None	precision
Logistic Regression	0.795077	0.827895	0.8528	0.0255743	21.5443	l2	liblinear	None	None	None	None	None	None	precision
Logistic Regression	0.795077	0.827895	0.8528	0.0255743	166.81	l2	liblinear	None	None	None	None	None	None	precision
Logistic Regression	0.79512	0.827859	0.8528	0.0255316	464.159	l1	liblinear	None	None	None	None	None	None	precision
Logistic Regression	0.795077	0.827895	0.8528	0.0255743	464.159	l2	liblinear	None	None	None	None	None	None	precision
Logistic Regression	0.79512	0.827865	0.8528	0.0255347	1291.55	l1	liblinear	None	None	None	None	None	None	precision
Logistic Regression	0.795077	0.827895	0.8528	0.0255743	1291.55	l2	liblinear	None	None	None	None	None	None	precision
Logistic Regression	0.794953	0.827863	0.8528	0.0256013	3593.81	l1	liblinear	None	None	None	None	None	None	precision
Logistic Regression	0.795077	0.827895	0.8528	0.0255743	3593.81	l2	liblinear	None	None	None	None	None	None	precision
Logistic Regression	0.79512	0.828069	0.852605	0.0253612	1	l2	liblinear	None	None	None	None	None	None	precision
SVC	0.798487	0.825446	0.844237	0.0188768	1	None	None	None	None	None	None	0.001	rbf	precision
SVC	0.801313	0.825098	0.842659	0.0172103	10	None	None	None	None	None	None	0.0001	rbf	precision
SVC	0.782519	0.816752	0.840645	0.0259725	1	None	None	None	None	None	None	0.001	linear	precision
SVC	0.782519	0.816752	0.840645	0.0259725	1	None	None	None	None	None	None	0.0001	linear	precision
SVC	0.782519	0.816745	0.840645	0.0259675	10	None	None	None	None	None	None	0.001	linear	precision
SVC	0.782519	0.816745	0.840645	0.0259675	10	None	None	None	None	None	None	0.0001	linear	precision
SVC	0.800647	0.804992	0.810198	0.00347877	1	None	None	None	None	None	None	0.0001	rbf	precision
RandomForestClassifier	0.925589	0.936162	0.950911	0.0104739	None	None	None	32	None	None	None	None	None	recall
GradientBoostingClassifier	0.921146	0.931453	0.94669	0.0113996	None	None	None	32	0.8	None	None	None	None	recall
ExtraTreesClassifier	0.915815	0.926344	0.94669	0.0127875	None	None	None	16	None	None	None	None	None	recall
ExtraTreesClassifier	0.924922	0.933629	0.946246	0.00971002	None	None	None	32	None	None	None	None	None	recall
RandomForestClassifier	0.917814	0.928565	0.944247	0.0125389	None	None	None	16	None	None	None	None	None	recall
GradientBoostingClassifier	0.916482	0.928032	0.943803	0.0116601	None	None	None	32	1	None	None	None	None	recall
GradientBoostingClassifier	0.914038	0.926966	0.943359	0.0129324	None	None	None	16	0.8	None	None	None	None	recall
GradientBoostingClassifier	0.913816	0.925944	0.940471	0.010438	None	None	None	16	1	None	None	None	None	recall
SVC	0.86717	0.872279	0.879831	0.00424483	10	None	None	None	None	None	None	0.001	rbf	recall
KNeighbors Classifier	0.859396	0.869169	0.878054	0.0073442	None	None	None	None	None	10	distance	None	None	recall
KNeighbors Classifier	0.855842	0.864549	0.875389	0.00762942	None	None	None	None	None	6	distance	None	None	recall
KNeighbors Classifier	0.858507	0.865926	0.8745	0.00697567	None	None	None	None	None	7	distance	None	None	recall
KNeighbors Classifier	0.854953	0.863083	0.870724	0.00641718	None	None	None	None	None	7	uniform	None	None	recall
KNeighbors Classifier	0.852954	0.860862	0.870502	0.0070726	None	None	None	None	None	5	distance	None	None	recall
KNeighbors Classifier	0.851399	0.858774	0.868725	0.0071652	None	None	None	None	None	5	uniform	None	None	recall
SVC	0.84207	0.847401	0.860951	0.00699883	1	None	None	None	None	None	None	0.001	rbf	recall
KNeighbors Classifier	0.821635	0.837672	0.857397	0.0140521	None	None	None	None	None	2	distance	None	None	recall
KNeighbors Classifier	0.821635	0.837672	0.857397	0.0140521	None	None	None	None	None	1	distance	None	None	recall
KNeighbors Classifier	0.821635	0.837672	0.857397	0.0140521	None	None	None	None	None	1	uniform	None	None	recall
SVC	0.836295	0.841582	0.853621	0.00622327	10	None	None	None	None	None	None	0.0001	rbf	recall
KNeighbors Classifier	0.833852	0.841359	0.851399	0.00699939	None	None	None	None	None	10	uniform	None	None	recall
SVC	0.834296	0.842159	0.849178	0.00643407	1	None	None	None	None	None	None	0.0001	linear	recall
SVC	0.834296	0.842115	0.849178	0.00629421	10	None	None	None	None	None	None	0.001	linear	recall
SVC	0.834296	0.842115	0.849178	0.00629421	10	None	None	None	None	None	None	0.0001	linear	recall
SVC	0.834296	0.842159	0.849178	0.00643407	1	None	None	None	None	None	None	0.001	linear	recall
Logistic Regression	0.828743	0.839049	0.848734	0.00671475	10000	l2	liblinear	None	None	None	None	None	None	recall
Logistic Regression	0.828743	0.839049	0.848734	0.00671475	166.81	l1	liblinear	None	None	None	None	None	None	recall
Logistic Regression	0.828743	0.839049	0.848734	0.00671475	7.74264	l2	liblinear	None	None	None	None	None	None	recall
Logistic Regression	0.828743	0.839049	0.848734	0.00671475	21.5443	l2	liblinear	None	None	None	None	None	None	recall
Logistic Regression	0.828743	0.839049	0.848734	0.00669414	10000	l1	liblinear	None	None	None	None	None	None	recall
Logistic Regression	0.828743	0.839049	0.848734	0.00671475	59.9484	l2	liblinear	None	None	None	None	None	None	recall
Logistic Regression	0.828743	0.839049	0.848734	0.00669414	2.78256	l1	liblinear	None	None	None	None	None	None	recall
Logistic Regression	0.828743	0.839049	0.848734	0.00671475	166.81	l2	liblinear	None	None	None	None	None	None	recall
Logistic Regression	0.828743	0.839049	0.848734	0.00671475	464.159	l2	liblinear	None	None	None	None	None	None	recall
Logistic Regression	0.828743	0.839049	0.848734	0.00671475	1291.55	l1	liblinear	None	None	None	None	None	None	recall
Logistic Regression	0.828743	0.839049	0.848734	0.00671475	1291.55	l2	liblinear	None	None	None	None	None	None	recall
Logistic Regression	0.828743	0.839094	0.848734	0.00667199	1	l2	liblinear	None	None	None	None	None	None	recall
Logistic Regression	0.828743	0.839005	0.848734	0.0066909	3593.81	l1	liblinear	None	None	None	None	None	None	recall
Logistic Regression	0.828743	0.839049	0.848734	0.00671475	3593.81	l2	liblinear	None	None	None	None	None	None	recall
Logistic Regression	0.828743	0.839094	0.848734	0.00671769	2.78256	l2	liblinear	None	None	None	None	None	None	recall
Logistic Regression	0.828743	0.839005	0.848512	0.00663015	1	l1	liblinear	None	None	None	None	None	None	recall
Logistic Regression	0.828743	0.83896	0.84829	0.00656675	7.74264	l1	liblinear	None	None	None	None	None	None	recall
Logistic Regression	0.828743	0.83896	0.84829	0.00658775	21.5443	l1	liblinear	None	None	None	None	None	None	recall
Logistic Regression	0.828743	0.83896	0.84829	0.00656675	59.9484	l1	liblinear	None	None	None	None	None	None	recall
Logistic Regression	0.828743	0.83896	0.84829	0.00658775	464.159	l1	liblinear	None	None	None	None	None	None	recall
SVC	0.8243	0.830653	0.838738	0.00566236	1	None	None	None	None	None	None	0.0001	rbf	recall
KNeighbors Classifier	0.814971	0.822035	0.831408	0.00766683	None	None	None	None	None	6	uniform	None	None	recall
KNeighbors Classifier	0.707019	0.732963	0.762328	0.0192669	None	None	None	None	None	2	uniform	None	None	recall
ExtraTreesClassifier	0.858357	0.921538	0.960663	0.0450645	None	None	None	32	None	None	None	None	None	f1
RandomForestClassifier	0.851811	0.91682	0.958549	0.0493728	None	None	None	32	None	None	None	None	None	f1
GradientBoostingClassifier	0.855045	0.917718	0.956722	0.046199	None	None	None	32	0.8	None	None	None	None	f1
ExtraTreesClassifier	0.858739	0.917969	0.954273	0.0438019	None	None	None	16	None	None	None	None	None	f1
GradientBoostingClassifier	0.850372	0.914707	0.953882	0.0473428	None	None	None	32	1	None	None	None	None	f1
RandomForestClassifier	0.851807	0.914976	0.953878	0.0471524	None	None	None	16	None	None	None	None	None	f1
GradientBoostingClassifier	0.84837	0.912377	0.953105	0.0474129	None	None	None	16	0.8	None	None	None	None	f1
GradientBoostingClassifier	0.849433	0.912581	0.953069	0.0467575	None	None	None	16	1	None	None	None	None	f1
KNeighbors Classifier	0.847618	0.880769	0.90388	0.0262733	None	None	None	None	None	6	distance	None	None	f1
KNeighbors Classifier	0.849651	0.880222	0.903591	0.023966	None	None	None	None	None	10	distance	None	None	f1
KNeighbors Classifier	0.845888	0.878714	0.901366	0.0260011	None	None	None	None	None	5	distance	None	None	f1
KNeighbors Classifier	0.847943	0.879978	0.901079	0.0246096	None	None	None	None	None	7	distance	None	None	f1
KNeighbors Classifier	0.829723	0.86499	0.891503	0.0282694	None	None	None	None	None	1	distance	None	None	f1
KNeighbors Classifier	0.829723	0.86499	0.891503	0.0282694	None	None	None	None	None	2	distance	None	None	f1
KNeighbors Classifier	0.829723	0.86499	0.891503	0.0282694	None	None	None	None	None	1	uniform	None	None	f1
KNeighbors Classifier	0.833546	0.867973	0.890641	0.026439	None	None	None	None	None	5	uniform	None	None	f1
KNeighbors Classifier	0.834753	0.867718	0.888965	0.0249307	None	None	None	None	None	7	uniform	None	None	f1
KNeighbors Classifier	0.830558	0.860535	0.87932	0.0214833	None	None	None	None	None	10	uniform	None	None	f1
KNeighbors Classifier	0.827091	0.856544	0.874613	0.021206	None	None	None	None	None	6	uniform	None	None	f1
SVC	0.823863	0.847293	0.862965	0.017063	10	None	None	None	None	None	None	0.001	rbf	f1
Logistic Regression	0.81664	0.833155	0.844425	0.0112212	10000	l2	liblinear	None	None	None	None	None	None	f1
Logistic Regression	0.81664	0.833104	0.844425	0.0112685	10000	l1	liblinear	None	None	None	None	None	None	f1
Logistic Regression	0.81664	0.833155	0.844425	0.0112212	1291.55	l2	liblinear	None	None	None	None	None	None	f1
Logistic Regression	0.816768	0.833155	0.844425	0.0112073	1291.55	l1	liblinear	None	None	None	None	None	None	f1
Logistic Regression	0.81664	0.833155	0.844425	0.0112212	464.159	l2	liblinear	None	None	None	None	None	None	f1
Logistic Regression	0.81664	0.833136	0.844425	0.0112076	464.159	l1	liblinear	None	None	None	None	None	None	f1
Logistic Regression	0.81664	0.833155	0.844425	0.0112212	166.81	l2	liblinear	None	None	None	None	None	None	f1
Logistic Regression	0.81664	0.833136	0.844425	0.0112076	166.81	l1	liblinear	None	None	None	None	None	None	f1
Logistic Regression	0.81664	0.833155	0.844425	0.0112212	59.9484	l2	liblinear	None	None	None	None	None	None	f1
Logistic Regression	0.81664	0.833155	0.844425	0.0112212	21.5443	l2	liblinear	None	None	None	None	None	None	f1
Logistic Regression	0.81664	0.833155	0.844425	0.0112212	7.74264	l2	liblinear	None	None	None	None	None	None	f1
Logistic Regression	0.816768	0.83313	0.844425	0.0112312	7.74264	l1	liblinear	None	None	None	None	None	None	f1
Logistic Regression	0.816679	0.833216	0.844425	0.0111607	2.78256	l2	liblinear	None	None	None	None	None	None	f1
Logistic Regression	0.81664	0.833155	0.844425	0.0112212	3593.81	l2	liblinear	None	None	None	None	None	None	f1
Logistic Regression	0.816768	0.833269	0.84439	0.011102	1	l2	liblinear	None	None	None	None	None	None	f1
Logistic Regression	0.816768	0.833171	0.844296	0.0111114	1	l1	liblinear	None	None	None	None	None	None	f1
Logistic Regression	0.816768	0.833155	0.844296	0.0111579	21.5443	l1	liblinear	None	None	None	None	None	None	f1
Logistic Regression	0.816768	0.833129	0.844296	0.0111406	2.78256	l1	liblinear	None	None	None	None	None	None	f1
Logistic Regression	0.81664	0.83311	0.844202	0.0111768	3593.81	l1	liblinear	None	None	None	None	None	None	f1
Logistic Regression	0.816768	0.833092	0.844202	0.011149	59.9484	l1	liblinear	None	None	None	None	None	None	f1
SVC	0.820646	0.836118	0.843899	0.00865436	1	None	None	None	None	None	None	0.001	rbf	f1
SVC	0.811718	0.828985	0.8425	0.0121677	1	None	None	None	None	None	None	0.001	linear	f1
SVC	0.811718	0.828985	0.8425	0.0121677	1	None	None	None	None	None	None	0.0001	linear	f1
SVC	0.811718	0.82896	0.842245	0.0121266	10	None	None	None	None	None	None	0.001	linear	f1
SVC	0.811718	0.82896	0.842245	0.0121266	10	None	None	None	None	None	None	0.0001	linear	f1
SVC	0.82034	0.833116	0.839465	0.00728979	10	None	None	None	None	None	None	0.0001	rbf	f1
KNeighbors Classifier	0.804983	0.821712	0.835038	0.011865	None	None	None	None	None	2	uniform	None	None	f1
SVC	0.812302	0.817608	0.822389	0.00322909	1	None	None	None	None	None	None	0.0001	rbf	f1
GradientBoostingClassifier	0.885711	0.954687	0.995835	0.049268	None	None	None	32	0.8	None	None	None	None	average_precision
GradientBoostingClassifier	0.875886	0.952899	0.995771	0.0520625	None	None	None	32	1	None	None	None	None	average_precision
GradientBoostingClassifier	0.874854	0.95023	0.994462	0.053302	None	None	None	16	0.8	None	None	None	None	average_precision
RandomForestClassifier	0.882408	0.95257	0.993789	0.050192	None	None	None	32	None	None	None	None	None	average_precision
GradientBoostingClassifier	0.875722	0.949466	0.993354	0.053279	None	None	None	16	1	None	None	None	None	average_precision
RandomForestClassifier	0.877746	0.947397	0.992069	0.0535073	None	None	None	16	None	None	None	None	None	average_precision
ExtraTreesClassifier	0.887857	0.953749	0.991687	0.046572	None	None	None	32	None	None	None	None	None	average_precision
ExtraTreesClassifier	0.88012	0.947791	0.989752	0.0510918	None	None	None	16	None	None	None	None	None	average_precision
KNeighbors Classifier	0.885499	0.935029	0.968628	0.0388051	None	None	None	None	None	10	distance	None	None	average_precision
KNeighbors Classifier	0.880939	0.933151	0.966917	0.0398093	None	None	None	None	None	7	distance	None	None	average_precision
KNeighbors Classifier	0.878255	0.931515	0.966328	0.0403166	None	None	None	None	None	6	distance	None	None	average_precision
KNeighbors Classifier	0.875613	0.929302	0.964974	0.040983	None	None	None	None	None	5	distance	None	None	average_precision
KNeighbors Classifier	0.864889	0.915874	0.949502	0.0398978	None	None	None	None	None	10	uniform	None	None	average_precision
KNeighbors Classifier	0.860476	0.914373	0.948656	0.0410758	None	None	None	None	None	7	uniform	None	None	average_precision
KNeighbors Classifier	0.857792	0.912966	0.947884	0.0417519	None	None	None	None	None	6	uniform	None	None	average_precision
KNeighbors Classifier	0.855566	0.91114	0.946813	0.0424115	None	None	None	None	None	5	uniform	None	None	average_precision
KNeighbors Classifier	0.831032	0.8945	0.936789	0.0500757	None	None	None	None	None	2	distance	None	None	average_precision
SVC	0.827613	0.889994	0.931116	0.0447938	10	None	None	None	None	None	None	0.001	rbf	average_precision
KNeighbors Classifier	0.816745	0.880649	0.923559	0.0508155	None	None	None	None	None	2	uniform	None	None	average_precision
Logistic Regression	0.828559	0.875499	0.907834	0.0330485	21.5443	l1	liblinear	None	None	None	None	None	None	average_precision
Logistic Regression	0.828551	0.875493	0.907833	0.03305	1291.55	l1	liblinear	None	None	None	None	None	None	average_precision
Logistic Regression	0.828556	0.875493	0.907829	0.0330469	59.9484	l1	liblinear	None	None	None	None	None	None	average_precision
Logistic Regression	0.828551	0.875494	0.907828	0.0330491	10000	l2	liblinear	None	None	None	None	None	None	average_precision
Logistic Regression	0.828551	0.875494	0.907828	0.0330491	1291.55	l2	liblinear	None	None	None	None	None	None	average_precision
Logistic Regression	0.828549	0.875494	0.907828	0.033049	59.9484	l2	liblinear	None	None	None	None	None	None	average_precision
Logistic Regression	0.828551	0.875494	0.907828	0.0330491	464.159	l2	liblinear	None	None	None	None	None	None	average_precision
Logistic Regression	0.828551	0.875494	0.907828	0.0330491	3593.81	l2	liblinear	None	None	None	None	None	None	average_precision
Logistic Regression	0.828551	0.875494	0.907827	0.0330488	166.81	l2	liblinear	None	None	None	None	None	None	average_precision
Logistic Regression	0.828548	0.87549	0.907827	0.0330486	2.78256	l1	liblinear	None	None	None	None	None	None	average_precision
Logistic Regression	0.828554	0.875495	0.907827	0.0330478	10000	l1	liblinear	None	None	None	None	None	None	average_precision
Logistic Regression	0.82856	0.875493	0.907825	0.0330463	7.74264	l1	liblinear	None	None	None	None	None	None	average_precision
Logistic Regression	0.828561	0.875497	0.907824	0.0330449	166.81	l1	liblinear	None	None	None	None	None	None	average_precision
Logistic Regression	0.828569	0.875498	0.907823	0.0330425	3593.81	l1	liblinear	None	None	None	None	None	None	average_precision
Logistic Regression	0.82855	0.875494	0.907822	0.0330465	21.5443	l2	liblinear	None	None	None	None	None	None	average_precision
Logistic Regression	0.828551	0.875494	0.907819	0.0330444	7.74264	l2	liblinear	None	None	None	None	None	None	average_precision
Logistic Regression	0.82856	0.875491	0.907818	0.0330436	464.159	l1	liblinear	None	None	None	None	None	None	average_precision
Logistic Regression	0.828535	0.875483	0.907818	0.0330538	1	l1	liblinear	None	None	None	None	None	None	average_precision
Logistic Regression	0.828561	0.875494	0.907812	0.0330369	2.78256	l2	liblinear	None	None	None	None	None	None	average_precision
Logistic Regression	0.828577	0.875493	0.907787	0.033013	1	l2	liblinear	None	None	None	None	None	None	average_precision
SVC	0.821559	0.871955	0.904801	0.0341512	1	None	None	None	None	None	None	0.001	rbf	average_precision
SVC	0.816453	0.866646	0.904353	0.0368405	10	None	None	None	None	None	None	0.001	linear	average_precision
SVC	0.816453	0.866646	0.904353	0.0368405	10	None	None	None	None	None	None	0.0001	linear	average_precision
SVC	0.81654	0.866655	0.904345	0.0368038	1	None	None	None	None	None	None	0.001	linear	average_precision
SVC	0.81654	0.866655	0.904345	0.0368038	1	None	None	None	None	None	None	0.0001	linear	average_precision
SVC	0.82121	0.866313	0.896687	0.0307509	10	None	None	None	None	None	None	0.0001	rbf	average_precision
KNeighbors Classifier	0.762808	0.833004	0.882098	0.0570545	None	None	None	None	None	1	distance	None	None	average_precision
KNeighbors Classifier	0.762808	0.833004	0.882098	0.0570545	None	None	None	None	None	1	uniform	None	None	average_precision
SVC	0.819146	0.845443	0.862771	0.0173863	1	None	None	None	None	None	None	0.0001	rbf	average_precision
GradientBoostingClassifier	0.909494	0.963423	0.995274	0.0383111	None	None	None	32	1	None	None	None	None	roc_auc
GradientBoostingClassifier	0.91466	0.964915	0.995075	0.0363356	None	None	None	32	0.8	None	None	None	None	roc_auc
GradientBoostingClassifier	0.907948	0.961198	0.994012	0.0389337	None	None	None	16	0.8	None	None	None	None	roc_auc
GradientBoostingClassifier	0.908859	0.961088	0.993318	0.0387721	None	None	None	16	1	None	None	None	None	roc_auc
RandomForestClassifier	0.915639	0.963835	0.992924	0.0352234	None	None	None	32	None	None	None	None	None	roc_auc
RandomForestClassifier	0.909158	0.960677	0.991273	0.0371861	None	None	None	16	None	None	None	None	None	roc_auc
ExtraTreesClassifier	0.917188	0.96309	0.990277	0.0330845	None	None	None	32	None	None	None	None	None	roc_auc
ExtraTreesClassifier	0.912217	0.960541	0.989994	0.035207	None	None	None	16	None	None	None	None	None	roc_auc
KNeighbors Classifier	0.906091	0.942038	0.966792	0.0278611	None	None	None	None	None	10	distance	None	None	roc_auc
KNeighbors Classifier	0.903622	0.940961	0.965335	0.0281348	None	None	None	None	None	7	distance	None	None	roc_auc
KNeighbors Classifier	0.902139	0.939899	0.96464	0.0283825	None	None	None	None	None	6	distance	None	None	roc_auc
KNeighbors Classifier	0.900397	0.938175	0.963359	0.0287361	None	None	None	None	None	5	distance	None	None	roc_auc
KNeighbors Classifier	0.893277	0.931194	0.956292	0.0291564	None	None	None	None	None	10	uniform	None	None	roc_auc
KNeighbors Classifier	0.891578	0.930799	0.955369	0.0294283	None	None	None	None	None	7	uniform	None	None	roc_auc
KNeighbors Classifier	0.890477	0.93018	0.955187	0.0296518	None	None	None	None	None	6	uniform	None	None	roc_auc
KNeighbors Classifier	0.889716	0.929127	0.954497	0.0298323	None	None	None	None	None	5	uniform	None	None	roc_auc
KNeighbors Classifier	0.871946	0.912679	0.939934	0.0319055	None	None	None	None	None	2	distance	None	None	roc_auc
KNeighbors Classifier	0.866051	0.907253	0.934789	0.0323094	None	None	None	None	None	2	uniform	None	None	roc_auc
SVC	0.871747	0.906972	0.930406	0.0248998	10	None	None	None	None	None	None	0.001	rbf	roc_auc
SVC	0.868482	0.894386	0.911223	0.0172461	1	None	None	None	None	None	None	0.001	rbf	roc_auc
Logistic Regression	0.866921	0.890999	0.906587	0.0163265	1	l1	liblinear	None	None	None	None	None	None	roc_auc
Logistic Regression	0.866912	0.890996	0.906578	0.016327	3593.81	l1	liblinear	None	None	None	None	None	None	roc_auc
Logistic Regression	0.866911	0.890996	0.906576	0.0163269	1291.55	l1	liblinear	None	None	None	None	None	None	roc_auc
Logistic Regression	0.866912	0.890996	0.906576	0.0163264	166.81	l1	liblinear	None	None	None	None	None	None	roc_auc
Logistic Regression	0.866916	0.890997	0.906576	0.0163271	21.5443	l1	liblinear	None	None	None	None	None	None	roc_auc
Logistic Regression	0.866911	0.890996	0.906576	0.0163265	2.78256	l1	liblinear	None	None	None	None	None	None	roc_auc
Logistic Regression	0.86691	0.890996	0.906576	0.0163285	59.9484	l2	liblinear	None	None	None	None	None	None	roc_auc
Logistic Regression	0.866904	0.890995	0.906576	0.0163291	7.74264	l1	liblinear	None	None	None	None	None	None	roc_auc
Logistic Regression	0.86691	0.890996	0.906576	0.0163286	10000	l2	liblinear	None	None	None	None	None	None	roc_auc
Logistic Regression	0.86691	0.890996	0.906576	0.0163286	1291.55	l2	liblinear	None	None	None	None	None	None	roc_auc
Logistic Regression	0.86691	0.890996	0.906576	0.0163286	464.159	l2	liblinear	None	None	None	None	None	None	roc_auc
Logistic Regression	0.86691	0.890996	0.906576	0.0163286	3593.81	l2	liblinear	None	None	None	None	None	None	roc_auc
Logistic Regression	0.86691	0.890996	0.906576	0.0163285	166.81	l2	liblinear	None	None	None	None	None	None	roc_auc
Logistic Regression	0.866902	0.890993	0.906576	0.0163303	464.159	l1	liblinear	None	None	None	None	None	None	roc_auc
Logistic Regression	0.866911	0.890997	0.906575	0.0163277	21.5443	l2	liblinear	None	None	None	None	None	None	roc_auc
Logistic Regression	0.866915	0.890998	0.906574	0.0163258	7.74264	l2	liblinear	None	None	None	None	None	None	roc_auc
Logistic Regression	0.866909	0.890994	0.906574	0.016327	59.9484	l1	liblinear	None	None	None	None	None	None	roc_auc
Logistic Regression	0.866911	0.890995	0.906572	0.016326	10000	l1	liblinear	None	None	None	None	None	None	roc_auc
Logistic Regression	0.866925	0.891	0.906572	0.0163205	2.78256	l2	liblinear	None	None	None	None	None	None	roc_auc
Logistic Regression	0.866945	0.891005	0.906564	0.0163057	1	l2	liblinear	None	None	None	None	None	None	roc_auc
SVC	0.860571	0.887396	0.905832	0.0189419	1	None	None	None	None	None	None	0.001	linear	roc_auc
SVC	0.860571	0.887396	0.905832	0.0189419	1	None	None	None	None	None	None	0.0001	linear	roc_auc
SVC	0.8605	0.887382	0.905827	0.018969	10	None	None	None	None	None	None	0.001	linear	roc_auc
SVC	0.8605	0.887382	0.905827	0.018969	10	None	None	None	None	None	None	0.0001	linear	roc_auc
SVC	0.867631	0.890279	0.905512	0.0151033	10	None	None	None	None	None	None	0.0001	rbf	roc_auc
KNeighbors Classifier	0.825411	0.867703	0.898601	0.0343859	None	None	None	None	None	1	uniform	None	None	roc_auc
KNeighbors Classifier	0.825411	0.867703	0.898601	0.0343859	None	None	None	None	None	1	distance	None	None	roc_auc
SVC	0.863149	0.874762	0.883455	0.00733957	1	None	None	None	None	None	None	0.0001	rbf	roc_auc
