# Supplementary material for: Maize Feature Store: A centralized resource to manage and analyze curated maize multi-omics features for machine learning applications
Source: Oxford University Press journal article supplement (doi:10.1093/database/baad078), 2023-01-01
Supplement: baad078_supp.zip [file baad078_supp.zip › suppl_data/Table_S6_Advanced_Model_RandomizedSearchCV_Scores_All.xlsx]

## Sheet: Table_S6_Advanced_Model_Randomi
Table S6. Hyperparameter tuning of six different models (1. Logistic Regression, 2. Random Forest Classifier, 3. Gradient Boosting Classifier, 4. Extra Trees Classifier, 5. KNeighborsClassifier, and 6. SVM Classifier) using the Scikit-Learns RandomizedSearchCV optimization technique. The table summarizes the algorithms' highest mean scores for each criterion (accuracy, average precision, f1, prec…
estimator	min_score	mean_score	max_score	std_score	solver	penalty	C	n_estimators	learning_rate	weights	n_neighbors	kernel	gamma	scoring_name
RandomForestClassifier	0.831741	0.912394	0.962794	0.0577817	None	None	None	32	None	None	None	None	None	accuracy
ExtraTreesClassifier	0.843292	0.916304	0.961462	0.0532943	None	None	None	32	None	None	None	None	None	accuracy
GradientBoostingClassifier	0.839849	0.913194	0.95813	0.0536441	None	None	None	32	0.8	None	None	None	None	accuracy
RandomForestClassifier	0.83474	0.910906	0.95713	0.0556458	None	None	None	16	None	None	None	None	None	accuracy
ExtraTreesClassifier	0.84307	0.914371	0.95602	0.050216	None	None	None	16	None	None	None	None	None	accuracy
GradientBoostingClassifier	0.834518	0.909973	0.955464	0.0552295	None	None	None	32	1	None	None	None	None	accuracy
GradientBoostingClassifier	0.83163	0.907419	0.954798	0.0557202	None	None	None	16	0.8	None	None	None	None	accuracy
GradientBoostingClassifier	0.833296	0.907996	0.954576	0.0545462	None	None	None	16	1	None	None	None	None	accuracy
KNeighbors Classifier	0.842626	0.88183	0.908374	0.0307679	None	None	None	None	None	distance	6	None	None	accuracy
KNeighbors Classifier	0.844625	0.880786	0.907263	0.0281649	None	None	None	None	None	distance	10	None	None	accuracy
KNeighbors Classifier	0.841404	0.880076	0.906153	0.03042	None	None	None	None	None	distance	5	None	None	accuracy
KNeighbors Classifier	0.843181	0.880897	0.905264	0.0288887	None	None	None	None	None	distance	7	None	None	accuracy
KNeighbors Classifier	0.825411	0.867703	0.898601	0.0343859	None	None	None	None	None	distance	2	None	None	accuracy
KNeighbors Classifier	0.825411	0.867703	0.898601	0.0343859	None	None	None	None	None	distance	1	None	None	accuracy
KNeighbors Classifier	0.826522	0.868192	0.895269	0.031736	None	None	None	None	None	uniform	5	None	None	accuracy
KNeighbors Classifier	0.827077	0.862839	0.884829	0.0258184	None	None	None	None	None	uniform	10	None	None	accuracy
KNeighbors Classifier	0.826188	0.861506	0.883163	0.0254132	None	None	None	None	None	uniform	6	None	None	accuracy
SVC	0.813749	0.842315	0.861839	0.0213453	None	None	10	None	None	None	None	rbf	0.001	accuracy
KNeighbors Classifier	0.819191	0.84056	0.85673	0.0160755	None	None	None	None	None	uniform	2	None	None	accuracy
Logistic Regression	0.811528	0.831741	0.844736	0.0143257	liblinear	l1	21.5443	None	None	None	None	None	None	accuracy
Logistic Regression	0.811528	0.831741	0.844736	0.0143257	liblinear	l2	59.9484	None	None	None	None	None	None	accuracy
Logistic Regression	0.811528	0.831741	0.844736	0.0143257	liblinear	l1	166.81	None	None	None	None	None	None	accuracy
Logistic Regression	0.811528	0.831741	0.844736	0.0143257	liblinear	l2	1291.55	None	None	None	None	None	None	accuracy
Logistic Regression	0.811639	0.831875	0.844736	0.0141819	liblinear	l2	1	None	None	None	None	None	None	accuracy
Logistic Regression	0.811528	0.831741	0.844736	0.0143257	liblinear	l2	7.74264	None	None	None	None	None	None	accuracy
Logistic Regression	0.811639	0.831764	0.844625	0.0142517	liblinear	l1	2.78256	None	None	None	None	None	None	accuracy
Logistic Regression	0.811639	0.831719	0.844625	0.0142577	liblinear	l1	1291.55	None	None	None	None	None	None	accuracy
Logistic Regression	0.811639	0.831719	0.844625	0.0142577	liblinear	l1	7.74264	None	None	None	None	None	None	accuracy
Logistic Regression	0.811528	0.831675	0.844514	0.014269	liblinear	l1	464.159	None	None	None	None	None	None	accuracy
SVC	0.815526	0.833785	0.843625	0.0108315	None	None	1	None	None	None	None	rbf	0.001	accuracy
SVC	0.80442	0.826011	0.841293	0.0155068	None	None	1	None	None	None	None	linear	0.001	accuracy
SVC	0.80442	0.826011	0.841293	0.0155068	None	None	1	None	None	None	None	linear	0.0001	accuracy
SVC	0.80442	0.825988	0.841071	0.0154779	None	None	10	None	None	None	None	linear	0.001	accuracy
SVC	0.80442	0.825988	0.841071	0.0154779	None	None	10	None	None	None	None	linear	0.0001	accuracy
SVC	0.815971	0.831319	0.840071	0.00939018	None	None	10	None	None	None	None	rbf	0.0001	accuracy
SVC	0.809529	0.814705	0.818858	0.00304528	None	None	1	None	None	None	None	rbf	0.0001	accuracy
ExtraTreesClassifier	0.791791	0.916002	0.994943	0.0940466	None	None	None	16	None	None	None	None	None	precision
RandomForestClassifier	0.778837	0.908206	0.994242	0.0999003	None	None	None	16	None	None	None	None	None	precision
RandomForestClassifier	0.77206	0.907988	0.993579	0.101801	None	None	None	32	None	None	None	None	None	precision
ExtraTreesClassifier	0.78803	0.91486	0.993573	0.0948163	None	None	None	32	None	None	None	None	None	precision
GradientBoostingClassifier	0.78125	0.910833	0.992833	0.0980155	None	None	None	32	0.8	None	None	None	None	precision
GradientBoostingClassifier	0.776026	0.908676	0.992782	0.100422	None	None	None	32	1	None	None	None	None	precision
GradientBoostingClassifier	0.771652	0.905467	0.990184	0.101418	None	None	None	16	0.8	None	None	None	None	precision
GradientBoostingClassifier	0.774465	0.906074	0.986098	0.0979909	None	None	None	16	1	None	None	None	None	precision
KNeighbors Classifier	0.868641	0.938603	0.984027	0.055109	None	None	None	None	None	uniform	2	None	None	precision
KNeighbors Classifier	0.806519	0.898722	0.961528	0.0739946	None	None	None	None	None	distance	2	None	None	precision
KNeighbors Classifier	0.806519	0.898722	0.961528	0.0739946	None	None	None	None	None	distance	1	None	None	precision
KNeighbors Classifier	0.821555	0.900351	0.950888	0.0614528	None	None	None	None	None	distance	6	None	None	precision
KNeighbors Classifier	0.822628	0.899975	0.949815	0.0607182	None	None	None	None	None	distance	5	None	None	precision
KNeighbors Classifier	0.822952	0.896869	0.944526	0.0572478	None	None	None	None	None	distance	7	None	None	precision
KNeighbors Classifier	0.822818	0.89639	0.943673	0.0543556	None	None	None	None	None	uniform	6	None	None	precision
KNeighbors Classifier	0.823027	0.893765	0.940851	0.0551656	None	None	None	None	None	distance	10	None	None	precision
KNeighbors Classifier	0.801106	0.880036	0.931813	0.060399	None	None	None	None	None	uniform	5	None	None	precision
KNeighbors Classifier	0.814167	0.882599	0.925844	0.0513619	None	None	None	None	None	uniform	10	None	None	precision
SVC	0.781431	0.824496	0.855988	0.0341031	None	None	10	None	None	None	None	rbf	0.001	precision
Logistic Regression	0.794953	0.82787	0.8528	0.0256062	liblinear	l1	21.5443	None	None	None	None	None	None	precision
Logistic Regression	0.795077	0.827895	0.8528	0.0255743	liblinear	l2	59.9484	None	None	None	None	None	None	precision
Logistic Regression	0.795077	0.827795	0.8528	0.0255334	liblinear	l1	166.81	None	None	None	None	None	None	precision
Logistic Regression	0.795077	0.827895	0.8528	0.0255743	liblinear	l2	1291.55	None	None	None	None	None	None	precision
Logistic Regression	0.79512	0.827858	0.8528	0.0255298	liblinear	l1	2.78256	None	None	None	None	None	None	precision
Logistic Regression	0.79512	0.827859	0.8528	0.0255316	liblinear	l1	1291.55	None	None	None	None	None	None	precision
Logistic Regression	0.795077	0.827895	0.8528	0.0255743	liblinear	l2	7.74264	None	None	None	None	None	None	precision
Logistic Regression	0.79512	0.827896	0.8528	0.0255583	liblinear	l1	7.74264	None	None	None	None	None	None	precision
Logistic Regression	0.795077	0.827895	0.8528	0.0255743	liblinear	l1	464.159	None	None	None	None	None	None	precision
Logistic Regression	0.79512	0.828069	0.852605	0.0253612	liblinear	l2	1	None	None	None	None	None	None	precision
SVC	0.798487	0.825446	0.844237	0.0188768	None	None	1	None	None	None	None	rbf	0.001	precision
SVC	0.801313	0.825098	0.842659	0.0172103	None	None	10	None	None	None	None	rbf	0.0001	precision
SVC	0.782519	0.816752	0.840645	0.0259725	None	None	1	None	None	None	None	linear	0.001	precision
SVC	0.782519	0.816752	0.840645	0.0259725	None	None	1	None	None	None	None	linear	0.0001	precision
SVC	0.782519	0.816745	0.840645	0.0259675	None	None	10	None	None	None	None	linear	0.001	precision
SVC	0.782519	0.816745	0.840645	0.0259675	None	None	10	None	None	None	None	linear	0.0001	precision
SVC	0.800647	0.804992	0.810198	0.00347877	None	None	1	None	None	None	None	rbf	0.0001	precision
RandomForestClassifier	0.926921	0.93594	0.949134	0.00983844	None	None	None	32	None	None	None	None	None	recall
GradientBoostingClassifier	0.921368	0.931497	0.94669	0.0113597	None	None	None	32	0.8	None	None	None	None	recall
ExtraTreesClassifier	0.922479	0.93283	0.946024	0.0106356	None	None	None	32	None	None	None	None	None	recall
RandomForestClassifier	0.916704	0.928565	0.944691	0.0129295	None	None	None	16	None	None	None	None	None	recall
GradientBoostingClassifier	0.916482	0.927943	0.943803	0.0117357	None	None	None	32	1	None	None	None	None	recall
ExtraTreesClassifier	0.918481	0.929231	0.943581	0.0113022	None	None	None	16	None	None	None	None	None	recall
GradientBoostingClassifier	0.914038	0.926966	0.943359	0.0129324	None	None	None	16	0.8	None	None	None	None	recall
GradientBoostingClassifier	0.913816	0.925944	0.940471	0.010438	None	None	None	16	1	None	None	None	None	recall
SVC	0.86717	0.872279	0.879831	0.00424483	None	None	10	None	None	None	None	rbf	0.001	recall
KNeighbors Classifier	0.859396	0.869169	0.878054	0.0073442	None	None	None	None	None	distance	10	None	None	recall
KNeighbors Classifier	0.855842	0.864549	0.875389	0.00762942	None	None	None	None	None	distance	6	None	None	recall
KNeighbors Classifier	0.858507	0.865926	0.8745	0.00697567	None	None	None	None	None	distance	7	None	None	recall
KNeighbors Classifier	0.852954	0.860862	0.870502	0.0070726	None	None	None	None	None	distance	5	None	None	recall
KNeighbors Classifier	0.851399	0.858774	0.868725	0.0071652	None	None	None	None	None	uniform	5	None	None	recall
SVC	0.84207	0.847401	0.860951	0.00699883	None	None	1	None	None	None	None	rbf	0.001	recall
KNeighbors Classifier	0.821635	0.837672	0.857397	0.0140521	None	None	None	None	None	distance	1	None	None	recall
KNeighbors Classifier	0.821635	0.837672	0.857397	0.0140521	None	None	None	None	None	distance	2	None	None	recall
SVC	0.836295	0.841582	0.853621	0.00622327	None	None	10	None	None	None	None	rbf	0.0001	recall
KNeighbors Classifier	0.833852	0.841359	0.851399	0.00699939	None	None	None	None	None	uniform	10	None	None	recall
SVC	0.834296	0.842159	0.849178	0.00643407	None	None	1	None	None	None	None	linear	0.001	recall
SVC	0.834296	0.842159	0.849178	0.00643407	None	None	1	None	None	None	None	linear	0.0001	recall
SVC	0.834296	0.842115	0.849178	0.00629421	None	None	10	None	None	None	None	linear	0.001	recall
SVC	0.834296	0.842115	0.849178	0.00629421	None	None	10	None	None	None	None	linear	0.0001	recall
Logistic Regression	0.828743	0.839049	0.848734	0.00669414	liblinear	l1	21.5443	None	None	None	None	None	None	recall
Logistic Regression	0.828743	0.839049	0.848734	0.00671475	liblinear	l2	59.9484	None	None	None	None	None	None	recall
Logistic Regression	0.828743	0.839049	0.848734	0.00671475	liblinear	l1	166.81	None	None	None	None	None	None	recall
Logistic Regression	0.828743	0.839049	0.848734	0.00671475	liblinear	l2	1291.55	None	None	None	None	None	None	recall
Logistic Regression	0.828743	0.839049	0.848734	0.00669414	liblinear	l1	2.78256	None	None	None	None	None	None	recall
Logistic Regression	0.828743	0.839094	0.848734	0.00667199	liblinear	l2	1	None	None	None	None	None	None	recall
Logistic Regression	0.828743	0.839005	0.848734	0.0066909	liblinear	l1	1291.55	None	None	None	None	None	None	recall
Logistic Regression	0.828743	0.839049	0.848734	0.00671475	liblinear	l2	7.74264	None	None	None	None	None	None	recall
Logistic Regression	0.828743	0.839049	0.848734	0.00669414	liblinear	l1	464.159	None	None	None	None	None	None	recall
Logistic Regression	0.828743	0.839005	0.84829	0.00659134	liblinear	l1	7.74264	None	None	None	None	None	None	recall
SVC	0.8243	0.830653	0.838738	0.00566236	None	None	1	None	None	None	None	rbf	0.0001	recall
KNeighbors Classifier	0.814971	0.822035	0.831408	0.00766683	None	None	None	None	None	uniform	6	None	None	recall
KNeighbors Classifier	0.707019	0.732963	0.762328	0.0192669	None	None	None	None	None	uniform	2	None	None	recall
RandomForestClassifier	0.851361	0.917295	0.960212	0.0496707	None	None	None	32	None	None	None	None	None	f1
ExtraTreesClassifier	0.858901	0.920953	0.959282	0.0453633	None	None	None	32	None	None	None	None	None	f1
GradientBoostingClassifier	0.855045	0.91767	0.956482	0.0461585	None	None	None	32	0.8	None	None	None	None	f1
RandomForestClassifier	0.846967	0.913355	0.954378	0.0481482	None	None	None	16	None	None	None	None	None	f1
GradientBoostingClassifier	0.850372	0.914683	0.953882	0.0473232	None	None	None	32	1	None	None	None	None	f1
ExtraTreesClassifier	0.85865	0.917509	0.953765	0.0432283	None	None	None	16	None	None	None	None	None	f1
GradientBoostingClassifier	0.84837	0.912377	0.953105	0.0474129	None	None	None	16	0.8	None	None	None	None	f1
GradientBoostingClassifier	0.849433	0.912581	0.953069	0.0467575	None	None	None	16	1	None	None	None	None	f1
KNeighbors Classifier	0.847618	0.880769	0.90388	0.0262733	None	None	None	None	None	distance	6	None	None	f1
KNeighbors Classifier	0.849651	0.880222	0.903591	0.023966	None	None	None	None	None	distance	10	None	None	f1
KNeighbors Classifier	0.845888	0.878714	0.901366	0.0260011	None	None	None	None	None	distance	5	None	None	f1
KNeighbors Classifier	0.847943	0.879978	0.901079	0.0246096	None	None	None	None	None	distance	7	None	None	f1
KNeighbors Classifier	0.829723	0.86499	0.891503	0.0282694	None	None	None	None	None	distance	1	None	None	f1
KNeighbors Classifier	0.829723	0.86499	0.891503	0.0282694	None	None	None	None	None	distance	2	None	None	f1
KNeighbors Classifier	0.833546	0.867973	0.890641	0.026439	None	None	None	None	None	uniform	5	None	None	f1
KNeighbors Classifier	0.830558	0.860535	0.87932	0.0214833	None	None	None	None	None	uniform	10	None	None	f1
KNeighbors Classifier	0.827091	0.856544	0.874613	0.021206	None	None	None	None	None	uniform	6	None	None	f1
SVC	0.823863	0.847293	0.862965	0.017063	None	None	10	None	None	None	None	rbf	0.001	f1
Logistic Regression	0.81664	0.833155	0.844425	0.0112212	liblinear	l2	59.9484	None	None	None	None	None	None	f1
Logistic Regression	0.816679	0.833144	0.844425	0.0111959	liblinear	l1	464.159	None	None	None	None	None	None	f1
Logistic Regression	0.81664	0.833155	0.844425	0.0112212	liblinear	l2	7.74264	None	None	None	None	None	None	f1
Logistic Regression	0.81664	0.833104	0.844425	0.0112685	liblinear	l1	1291.55	None	None	None	None	None	None	f1
Logistic Regression	0.816768	0.833162	0.844425	0.01117	liblinear	l1	166.81	None	None	None	None	None	None	f1
Logistic Regression	0.81664	0.833155	0.844425	0.0112212	liblinear	l2	1291.55	None	None	None	None	None	None	f1
Logistic Regression	0.816768	0.833269	0.84439	0.011102	liblinear	l2	1	None	None	None	None	None	None	f1
Logistic Regression	0.816768	0.833154	0.844296	0.0111277	liblinear	l1	2.78256	None	None	None	None	None	None	f1
Logistic Regression	0.816768	0.833155	0.844296	0.0111579	liblinear	l1	7.74264	None	None	None	None	None	None	f1
Logistic Regression	0.816768	0.833092	0.844202	0.011149	liblinear	l1	21.5443	None	None	None	None	None	None	f1
SVC	0.820646	0.836118	0.843899	0.00865436	None	None	1	None	None	None	None	rbf	0.001	f1
SVC	0.811718	0.828985	0.8425	0.0121677	None	None	1	None	None	None	None	linear	0.001	f1
SVC	0.811718	0.828985	0.8425	0.0121677	None	None	1	None	None	None	None	linear	0.0001	f1
SVC	0.811718	0.82896	0.842245	0.0121266	None	None	10	None	None	None	None	linear	0.0001	f1
SVC	0.811718	0.82896	0.842245	0.0121266	None	None	10	None	None	None	None	linear	0.001	f1
SVC	0.82034	0.833116	0.839465	0.00728979	None	None	10	None	None	None	None	rbf	0.0001	f1
KNeighbors Classifier	0.804983	0.821712	0.835038	0.011865	None	None	None	None	None	uniform	2	None	None	f1
SVC	0.812302	0.817608	0.822389	0.00322909	None	None	1	None	None	None	None	rbf	0.0001	f1
GradientBoostingClassifier	0.875863	0.952889	0.995771	0.0520748	None	None	None	32	1	None	None	None	None	average_precision
GradientBoostingClassifier	0.885701	0.954604	0.995753	0.0492617	None	None	None	32	0.8	None	None	None	None	average_precision
GradientBoostingClassifier	0.874854	0.950229	0.994456	0.053301	None	None	None	16	0.8	None	None	None	None	average_precision
RandomForestClassifier	0.892121	0.953738	0.993708	0.0483536	None	None	None	32	None	None	None	None	None	average_precision
GradientBoostingClassifier	0.875944	0.94951	0.993355	0.0532178	None	None	None	16	1	None	None	None	None	average_precision
RandomForestClassifier	0.873294	0.946748	0.991996	0.0545145	None	None	None	16	None	None	None	None	None	average_precision
ExtraTreesClassifier	0.895928	0.954708	0.991933	0.0452652	None	None	None	32	None	None	None	None	None	average_precision
ExtraTreesClassifier	0.872595	0.945858	0.989161	0.0528017	None	None	None	16	None	None	None	None	None	average_precision
KNeighbors Classifier	0.885499	0.935029	0.968628	0.0388051	None	None	None	None	None	distance	10	None	None	average_precision
KNeighbors Classifier	0.880939	0.933151	0.966917	0.0398093	None	None	None	None	None	distance	7	None	None	average_precision
KNeighbors Classifier	0.878255	0.931515	0.966328	0.0403166	None	None	None	None	None	distance	6	None	None	average_precision
KNeighbors Classifier	0.875613	0.929302	0.964974	0.040983	None	None	None	None	None	distance	5	None	None	average_precision
KNeighbors Classifier	0.864889	0.915874	0.949502	0.0398978	None	None	None	None	None	uniform	10	None	None	average_precision
KNeighbors Classifier	0.857792	0.912966	0.947884	0.0417519	None	None	None	None	None	uniform	6	None	None	average_precision
KNeighbors Classifier	0.855566	0.91114	0.946813	0.0424115	None	None	None	None	None	uniform	5	None	None	average_precision
KNeighbors Classifier	0.831032	0.8945	0.936789	0.0500757	None	None	None	None	None	distance	2	None	None	average_precision
SVC	0.827613	0.889994	0.931116	0.0447938	None	None	10	None	None	None	None	rbf	0.001	average_precision
KNeighbors Classifier	0.816745	0.880649	0.923559	0.0508155	None	None	None	None	None	uniform	2	None	None	average_precision
Logistic Regression	0.828559	0.875495	0.907831	0.0330468	liblinear	l1	21.5443	None	None	None	None	None	None	average_precision
Logistic Regression	0.828549	0.87549	0.90783	0.0330484	liblinear	l1	7.74264	None	None	None	None	None	None	average_precision
Logistic Regression	0.828557	0.875495	0.907829	0.0330469	liblinear	l1	1291.55	None	None	None	None	None	None	average_precision
Logistic Regression	0.828551	0.875494	0.907828	0.0330491	liblinear	l2	1291.55	None	None	None	None	None	None	average_precision
Logistic Regression	0.828549	0.875494	0.907828	0.033049	liblinear	l2	59.9484	None	None	None	None	None	None	average_precision
Logistic Regression	0.828561	0.875496	0.907826	0.0330455	liblinear	l1	464.159	None	None	None	None	None	None	average_precision
Logistic Regression	0.828557	0.87549	0.907825	0.0330454	liblinear	l1	166.81	None	None	None	None	None	None	average_precision
Logistic Regression	0.828551	0.875492	0.907822	0.03305	liblinear	l1	2.78256	None	None	None	None	None	None	average_precision
Logistic Regression	0.828551	0.875494	0.907819	0.0330444	liblinear	l2	7.74264	None	None	None	None	None	None	average_precision
Logistic Regression	0.828577	0.875493	0.907787	0.033013	liblinear	l2	1	None	None	None	None	None	None	average_precision
SVC	0.821559	0.871955	0.904801	0.0341512	None	None	1	None	None	None	None	rbf	0.001	average_precision
SVC	0.816453	0.866646	0.904353	0.0368405	None	None	10	None	None	None	None	linear	0.0001	average_precision
SVC	0.816453	0.866646	0.904353	0.0368405	None	None	10	None	None	None	None	linear	0.001	average_precision
SVC	0.81654	0.866655	0.904345	0.0368038	None	None	1	None	None	None	None	linear	0.001	average_precision
SVC	0.81654	0.866655	0.904345	0.0368038	None	None	1	None	None	None	None	linear	0.0001	average_precision
SVC	0.82121	0.866313	0.896687	0.0307509	None	None	10	None	None	None	None	rbf	0.0001	average_precision
KNeighbors Classifier	0.762808	0.833004	0.882098	0.0570545	None	None	None	None	None	distance	1	None	None	average_precision
SVC	0.819146	0.845443	0.862771	0.0173863	None	None	1	None	None	None	None	rbf	0.0001	average_precision
GradientBoostingClassifier	0.909494	0.96341	0.995271	0.0383008	None	None	None	32	1	None	None	None	None	roc_auc
GradientBoostingClassifier	0.914603	0.964931	0.994981	0.0362511	None	None	None	32	0.8	None	None	None	None	roc_auc
GradientBoostingClassifier	0.907948	0.961198	0.994012	0.0389335	None	None	None	16	0.8	None	None	None	None	roc_auc
RandomForestClassifier	0.916904	0.964422	0.993324	0.0349844	None	None	None	32	None	None	None	None	None	roc_auc
GradientBoostingClassifier	0.908977	0.961111	0.993315	0.0387399	None	None	None	16	1	None	None	None	None	roc_auc
RandomForestClassifier	0.91032	0.960875	0.991924	0.0368912	None	None	None	16	None	None	None	None	None	roc_auc
ExtraTreesClassifier	0.918692	0.963377	0.990441	0.0329339	None	None	None	32	None	None	None	None	None	roc_auc
ExtraTreesClassifier	0.91513	0.960573	0.988514	0.0338805	None	None	None	16	None	None	None	None	None	roc_auc
KNeighbors Classifier	0.906091	0.942038	0.966792	0.0278611	None	None	None	None	None	distance	10	None	None	roc_auc
KNeighbors Classifier	0.903622	0.940961	0.965335	0.0281348	None	None	None	None	None	distance	7	None	None	roc_auc
KNeighbors Classifier	0.902139	0.939899	0.96464	0.0283825	None	None	None	None	None	distance	6	None	None	roc_auc
KNeighbors Classifier	0.900397	0.938175	0.963359	0.0287361	None	None	None	None	None	distance	5	None	None	roc_auc
KNeighbors Classifier	0.893277	0.931194	0.956292	0.0291564	None	None	None	None	None	uniform	10	None	None	roc_auc
KNeighbors Classifier	0.890477	0.93018	0.955187	0.0296518	None	None	None	None	None	uniform	6	None	None	roc_auc
KNeighbors Classifier	0.889716	0.929127	0.954497	0.0298323	None	None	None	None	None	uniform	5	None	None	roc_auc
KNeighbors Classifier	0.871946	0.912679	0.939934	0.0319055	None	None	None	None	None	distance	2	None	None	roc_auc
KNeighbors Classifier	0.866051	0.907253	0.934789	0.0323094	None	None	None	None	None	uniform	2	None	None	roc_auc
SVC	0.871747	0.906972	0.930406	0.0248998	None	None	10	None	None	None	None	rbf	0.001	roc_auc
SVC	0.868482	0.894386	0.911223	0.0172461	None	None	1	None	None	None	None	rbf	0.001	roc_auc
Logistic Regression	0.866917	0.890997	0.906577	0.0163252	liblinear	l1	2.78256	None	None	None	None	None	None	roc_auc
Logistic Regression	0.866905	0.890994	0.906577	0.0163291	liblinear	l1	166.81	None	None	None	None	None	None	roc_auc
Logistic Regression	0.86691	0.890994	0.906576	0.0163281	liblinear	l1	464.159	None	None	None	None	None	None	roc_auc
Logistic Regression	0.866909	0.890996	0.906576	0.0163277	liblinear	l1	21.5443	None	None	None	None	None	None	roc_auc
Logistic Regression	0.86691	0.890996	0.906576	0.0163285	liblinear	l2	59.9484	None	None	None	None	None	None	roc_auc
Logistic Regression	0.86691	0.890996	0.906576	0.0163286	liblinear	l2	1291.55	None	None	None	None	None	None	roc_auc
Logistic Regression	0.866914	0.890995	0.906575	0.0163271	liblinear	l1	7.74264	None	None	None	None	None	None	roc_auc
Logistic Regression	0.866915	0.890998	0.906574	0.0163258	liblinear	l2	7.74264	None	None	None	None	None	None	roc_auc
Logistic Regression	0.86691	0.890994	0.906572	0.0163265	liblinear	l1	1291.55	None	None	None	None	None	None	roc_auc
Logistic Regression	0.866945	0.891005	0.906564	0.0163057	liblinear	l2	1	None	None	None	None	None	None	roc_auc
SVC	0.860571	0.887396	0.905832	0.0189419	None	None	1	None	None	None	None	linear	0.001	roc_auc
SVC	0.860571	0.887396	0.905832	0.0189419	None	None	1	None	None	None	None	linear	0.0001	roc_auc
SVC	0.8605	0.887382	0.905827	0.018969	None	None	10	None	None	None	None	linear	0.001	roc_auc
SVC	0.8605	0.887382	0.905827	0.018969	None	None	10	None	None	None	None	linear	0.0001	roc_auc
SVC	0.867631	0.890279	0.905512	0.0151033	None	None	10	None	None	None	None	rbf	0.0001	roc_auc
KNeighbors Classifier	0.825411	0.867703	0.898601	0.0343859	None	None	None	None	None	distance	1	None	None	roc_auc
SVC	0.863149	0.874762	0.883455	0.00733957	None	None	1	None	None	None	None	rbf	0.0001	roc_auc
