# Supplementary material for: Maize Feature Store: A centralized resource to manage and analyze curated maize multi-omics features for machine learning applications
Source: Oxford University Press journal article supplement (doi:10.1093/database/baad078), 2023-01-01
Supplement: baad078_supp.zip [file baad078_supp.zip › suppl_data/Table_S7_Basic_Model_RandomizedSearchCV_Scores_All.xlsx]

## Sheet: seq_scores_all
Table S7. Hyperparameter tuning of six different models (1. Logistic Regression, 2. Random Forest Classifier, 3. Gradient Boosting Classifier, 4. Extra Trees Classifier, 5. KNeighborsClassifier, and 6. SVM Classifier) using the Scikit-Learns RandomizedSearchCV optimization technique. The table summarizes the algorithms' highest mean scores for each criterion (accuracy, average precision, f1, prec…
estimator	min_score	mean_score	max_score	std_score	solver	penalty	C	n_estimators	learning_rate	weights	n_neighbors	kernel	gamma	scoring_name
GradientBoostingClassifier	0.743781	0.860395	0.931253	0.083369	None	None	None	32	0.8	None	None	None	None	accuracy
RandomForestClassifier	0.788983	0.875211	0.929698	0.063507	None	None	None	32	None	None	None	None	None	accuracy
ExtraTreesClassifier	0.80542	0.881297	0.927477	0.0553656	None	None	None	32	None	None	None	None	None	accuracy
GradientBoostingClassifier	0.734673	0.855131	0.92681	0.0863483	None	None	None	32	1	None	None	None	None	accuracy
RandomForestClassifier	0.782985	0.870124	0.923701	0.0636952	None	None	None	16	None	None	None	None	None	accuracy
GradientBoostingClassifier	0.745113	0.853954	0.922479	0.0799255	None	None	None	16	0.8	None	None	None	None	accuracy
ExtraTreesClassifier	0.807641	0.873723	0.91737	0.0513547	None	None	None	16	None	None	None	None	None	accuracy
GradientBoostingClassifier	0.726899	0.847779	0.917037	0.0835535	None	None	None	16	1	None	None	None	None	accuracy
KNeighbors Classifier	0.789316	0.832452	0.865171	0.0334788	None	None	None	None	None	distance	6	None	None	accuracy
KNeighbors Classifier	0.783207	0.827454	0.860395	0.0347683	None	None	None	None	None	distance	5	None	None	accuracy
KNeighbors Classifier	0.788983	0.830031	0.859729	0.0331258	None	None	None	None	None	distance	1	None	None	accuracy
KNeighbors Classifier	0.788983	0.830031	0.859729	0.0331258	None	None	None	None	None	distance	2	None	None	accuracy
KNeighbors Classifier	0.785207	0.829187	0.858952	0.0334716	None	None	None	None	None	distance	10	None	None	accuracy
KNeighbors Classifier	0.785762	0.827499	0.855953	0.0322064	None	None	None	None	None	distance	7	None	None	accuracy
KNeighbors Classifier	0.762328	0.80924	0.84307	0.0365837	None	None	None	None	None	uniform	5	None	None	accuracy
KNeighbors Classifier	0.753554	0.796157	0.8243	0.0321148	None	None	None	None	None	uniform	10	None	None	accuracy
KNeighbors Classifier	0.754554	0.794491	0.819636	0.0291535	None	None	None	None	None	uniform	6	None	None	accuracy
KNeighbors Classifier	0.754887	0.776588	0.793425	0.0177734	None	None	None	None	None	uniform	2	None	None	accuracy
SVC	0.73534	0.76817	0.788427	0.0230541	None	None	10	None	None	None	None	rbf	0.001	accuracy
SVC	0.735118	0.749178	0.759107	0.0100983	None	None	1	None	None	None	None	rbf	0.001	accuracy
SVC	0.737228	0.739183	0.74056	0.00123793	None	None	10	None	None	None	None	rbf	0.0001	accuracy
SVC	0.708019	0.722479	0.739005	0.0135483	None	None	1	None	None	None	None	rbf	0.0001	accuracy
SVC	0.73323	0.735007	0.736673	0.00118165	None	None	1	None	None	None	None	linear	0.001	accuracy
SVC	0.73323	0.735007	0.736673	0.00118165	None	None	1	None	None	None	None	linear	0.0001	accuracy
SVC	0.733341	0.735007	0.736673	0.00113479	None	None	10	None	None	None	None	linear	0.001	accuracy
SVC	0.733341	0.735007	0.736673	0.00113479	None	None	10	None	None	None	None	linear	0.0001	accuracy
Logistic Regression	0.72701	0.729742	0.733119	0.00252538	liblinear	l1	2.78256	None	None	None	None	None	None	accuracy
Logistic Regression	0.727121	0.729787	0.733119	0.0024854	liblinear	l2	1	None	None	None	None	None	None	accuracy
Logistic Regression	0.72701	0.729765	0.733119	0.0025095	liblinear	l1	7.74264	None	None	None	None	None	None	accuracy
Logistic Regression	0.727121	0.729787	0.733119	0.0024854	liblinear	l1	21.5443	None	None	None	None	None	None	accuracy
Logistic Regression	0.72701	0.729742	0.733008	0.00248004	liblinear	l2	59.9484	None	None	None	None	None	None	accuracy
Logistic Regression	0.72701	0.729765	0.733008	0.00250458	liblinear	l1	166.81	None	None	None	None	None	None	accuracy
Logistic Regression	0.72701	0.729742	0.733008	0.00248004	liblinear	l2	1291.55	None	None	None	None	None	None	accuracy
Logistic Regression	0.72701	0.729765	0.733008	0.00250458	liblinear	l1	1291.55	None	None	None	None	None	None	accuracy
Logistic Regression	0.72701	0.729742	0.733008	0.00248004	liblinear	l2	7.74264	None	None	None	None	None	None	accuracy
Logistic Regression	0.72701	0.729765	0.733008	0.00250458	liblinear	l1	464.159	None	None	None	None	None	None	accuracy
ExtraTreesClassifier	0.754463	0.894188	0.983438	0.105104	None	None	None	32	None	None	None	None	None	precision
RandomForestClassifier	0.730646	0.88561	0.982711	0.118143	None	None	None	32	None	None	None	None	None	precision
RandomForestClassifier	0.73499	0.885928	0.982224	0.114462	None	None	None	16	None	None	None	None	None	precision
ExtraTreesClassifier	0.75853	0.892774	0.979395	0.103607	None	None	None	16	None	None	None	None	None	precision
GradientBoostingClassifier	0.682461	0.865078	0.979028	0.137369	None	None	None	32	0.8	None	None	None	None	precision
GradientBoostingClassifier	0.673956	0.860951	0.977861	0.141166	None	None	None	32	1	None	None	None	None	precision
KNeighbors Classifier	0.849194	0.924056	0.975865	0.0589343	None	None	None	None	None	uniform	2	None	None	precision
GradientBoostingClassifier	0.683093	0.854793	0.962549	0.130983	None	None	None	16	0.8	None	None	None	None	precision
GradientBoostingClassifier	0.666776	0.85048	0.961642	0.133996	None	None	None	16	1	None	None	None	None	precision
KNeighbors Classifier	0.795547	0.887264	0.949247	0.072715	None	None	None	None	None	distance	2	None	None	precision
KNeighbors Classifier	0.795547	0.887264	0.949247	0.072715	None	None	None	None	None	distance	1	None	None	precision
KNeighbors Classifier	0.794883	0.880689	0.942888	0.067047	None	None	None	None	None	distance	6	None	None	precision
KNeighbors Classifier	0.792163	0.878831	0.940777	0.0685484	None	None	None	None	None	distance	5	None	None	precision
KNeighbors Classifier	0.79179	0.876233	0.933694	0.065223	None	None	None	None	None	distance	7	None	None	precision
KNeighbors Classifier	0.789189	0.873262	0.930933	0.0639886	None	None	None	None	None	distance	10	None	None	precision
KNeighbors Classifier	0.785359	0.870466	0.924668	0.06312	None	None	None	None	None	uniform	6	None	None	precision
KNeighbors Classifier	0.760362	0.845701	0.905062	0.067012	None	None	None	None	None	uniform	5	None	None	precision
KNeighbors Classifier	0.76954	0.851642	0.904377	0.0610971	None	None	None	None	None	uniform	10	None	None	precision
SVC	0.711266	0.756875	0.786189	0.0330463	None	None	10	None	None	None	None	rbf	0.001	precision
SVC	0.725357	0.743731	0.758018	0.0137111	None	None	1	None	None	None	None	rbf	0.001	precision
SVC	0.687337	0.712911	0.745326	0.0245896	None	None	1	None	None	None	None	rbf	0.0001	precision
SVC	0.733636	0.736083	0.738444	0.00196873	None	None	10	None	None	None	None	rbf	0.0001	precision
SVC	0.728017	0.732676	0.73708	0.0035733	None	None	10	None	None	None	None	linear	0.001	precision
SVC	0.728017	0.732676	0.73708	0.0035733	None	None	10	None	None	None	None	linear	0.0001	precision
SVC	0.727919	0.732656	0.73702	0.00357997	None	None	1	None	None	None	None	linear	0.001	precision
SVC	0.727919	0.732656	0.73702	0.00357997	None	None	1	None	None	None	None	linear	0.0001	precision
Logistic Regression	0.725198	0.729182	0.736321	0.00438519	liblinear	l1	2.78256	None	None	None	None	None	None	precision
Logistic Regression	0.725258	0.729182	0.736321	0.00436603	liblinear	l2	1	None	None	None	None	None	None	precision
Logistic Regression	0.725258	0.729182	0.736321	0.00438438	liblinear	l1	7.74264	None	None	None	None	None	None	precision
Logistic Regression	0.725258	0.72917	0.736321	0.00439459	liblinear	l1	21.5443	None	None	None	None	None	None	precision
Logistic Regression	0.725258	0.729137	0.736155	0.00432211	liblinear	l2	59.9484	None	None	None	None	None	None	precision
Logistic Regression	0.725258	0.729149	0.736155	0.00433057	liblinear	l1	166.81	None	None	None	None	None	None	precision
Logistic Regression	0.725258	0.729137	0.736155	0.00432211	liblinear	l2	1291.55	None	None	None	None	None	None	precision
Logistic Regression	0.725258	0.729149	0.736155	0.00433057	liblinear	l1	1291.55	None	None	None	None	None	None	precision
Logistic Regression	0.725258	0.729137	0.736155	0.00432211	liblinear	l2	7.74264	None	None	None	None	None	None	precision
Logistic Regression	0.725258	0.729149	0.736155	0.00433057	liblinear	l1	464.159	None	None	None	None	None	None	precision
GradientBoostingClassifier	0.872945	0.892492	0.920702	0.0197972	None	None	None	32	0.8	None	None	None	None	recall
GradientBoostingClassifier	0.869614	0.889072	0.919147	0.021236	None	None	None	32	1	None	None	None	None	recall
GradientBoostingClassifier	0.866726	0.890049	0.917592	0.0216048	None	None	None	16	0.8	None	None	None	None	recall
RandomForestClassifier	0.867837	0.887028	0.910484	0.0191308	None	None	None	32	None	None	None	None	None	recall
GradientBoostingClassifier	0.86406	0.883296	0.908041	0.0199128	None	None	None	16	1	None	None	None	None	recall
ExtraTreesClassifier	0.871835	0.885962	0.905598	0.0144477	None	None	None	32	None	None	None	None	None	recall
RandomForestClassifier	0.855175	0.874411	0.904043	0.0215524	None	None	None	16	None	None	None	None	None	recall
ExtraTreesClassifier	0.853398	0.87028	0.894713	0.0177854	None	None	None	16	None	None	None	None	None	recall
SVC	0.788983	0.793247	0.796979	0.00299793	None	None	10	None	None	None	None	rbf	0.001	recall
KNeighbors Classifier	0.765882	0.775566	0.780098	0.00524249	None	None	None	None	None	distance	6	None	None	recall
KNeighbors Classifier	0.773212	0.776011	0.778321	0.0018187	None	None	None	None	None	distance	10	None	None	recall
KNeighbors Classifier	0.754109	0.764016	0.777876	0.00927253	None	None	None	None	None	distance	2	None	None	recall
KNeighbors Classifier	0.754109	0.764016	0.777876	0.00927253	None	None	None	None	None	distance	1	None	None	recall
KNeighbors Classifier	0.761884	0.769036	0.775433	0.00480198	None	None	None	None	None	distance	7	None	None	recall
KNeighbors Classifier	0.759218	0.766193	0.769214	0.00363795	None	None	None	None	None	distance	5	None	None	recall
KNeighbors Classifier	0.757441	0.763927	0.766548	0.00346228	None	None	None	None	None	uniform	5	None	None	recall
SVC	0.756775	0.760817	0.763883	0.00233557	None	None	1	None	None	None	None	rbf	0.001	recall
SVC	0.726122	0.748156	0.763216	0.0144257	None	None	1	None	None	None	None	rbf	0.0001	recall
SVC	0.734785	0.745802	0.754331	0.0078628	None	None	10	None	None	None	None	rbf	0.0001	recall
SVC	0.725233	0.740204	0.750555	0.0106893	None	None	1	None	None	None	None	linear	0.001	recall
SVC	0.725233	0.740204	0.750555	0.0106893	None	None	1	None	None	None	None	linear	0.0001	recall
SVC	0.725455	0.74016	0.750333	0.010545	None	None	10	None	None	None	None	linear	0.001	recall
SVC	0.725455	0.74016	0.750333	0.010545	None	None	10	None	None	None	None	linear	0.0001	recall
Logistic Regression	0.726344	0.731186	0.734118	0.00273636	liblinear	l1	21.5443	None	None	None	None	None	None	recall
Logistic Regression	0.726344	0.731142	0.734118	0.00270444	liblinear	l2	59.9484	None	None	None	None	None	None	recall
Logistic Regression	0.726344	0.731142	0.734118	0.00275146	liblinear	l1	166.81	None	None	None	None	None	None	recall
Logistic Regression	0.726344	0.731142	0.734118	0.00270444	liblinear	l2	1291.55	None	None	None	None	None	None	recall
Logistic Regression	0.726344	0.731231	0.734118	0.00272407	liblinear	l1	2.78256	None	None	None	None	None	None	recall
Logistic Regression	0.726344	0.731186	0.734118	0.00269274	liblinear	l2	1	None	None	None	None	None	None	recall
Logistic Regression	0.726344	0.731186	0.734118	0.00273636	liblinear	l1	1291.55	None	None	None	None	None	None	recall
Logistic Regression	0.726344	0.731142	0.734118	0.00270444	liblinear	l2	7.74264	None	None	None	None	None	None	recall
Logistic Regression	0.726344	0.731186	0.734118	0.00273636	liblinear	l1	7.74264	None	None	None	None	None	None	recall
Logistic Regression	0.726344	0.731142	0.734118	0.00270444	liblinear	l1	464.159	None	None	None	None	None	None	recall
KNeighbors Classifier	0.717681	0.722612	0.729009	0.00378367	None	None	None	None	None	uniform	10	None	None	recall
KNeighbors Classifier	0.694136	0.697335	0.700578	0.00258886	None	None	None	None	None	uniform	6	None	None	recall
KNeighbors Classifier	0.592403	0.606397	0.620391	0.00983383	None	None	None	None	None	uniform	2	None	None	recall
RandomForestClassifier	0.810463	0.883037	0.928154	0.0523421	None	None	None	32	None	None	None	None	None	f1
GradientBoostingClassifier	0.780641	0.871182	0.927645	0.0652184	None	None	None	32	0.8	None	None	None	None	f1
ExtraTreesClassifier	0.827719	0.88663	0.924417	0.0438	None	None	None	32	None	None	None	None	None	f1
GradientBoostingClassifier	0.775005	0.866918	0.922553	0.0665544	None	None	None	32	1	None	None	None	None	f1
RandomForestClassifier	0.803775	0.873837	0.919212	0.0507771	None	None	None	16	None	None	None	None	None	f1
GradientBoostingClassifier	0.782031	0.865022	0.918969	0.0614548	None	None	None	16	0.8	None	None	None	None	f1
GradientBoostingClassifier	0.768608	0.859379	0.912952	0.0637912	None	None	None	16	1	None	None	None	None	f1
ExtraTreesClassifier	0.820707	0.875821	0.91272	0.0429247	None	None	None	16	None	None	None	None	None	f1
KNeighbors Classifier	0.787308	0.823436	0.852204	0.0282405	None	None	None	None	None	distance	6	None	None	f1
KNeighbors Classifier	0.779833	0.817328	0.846389	0.0295734	None	None	None	None	None	distance	5	None	None	f1
KNeighbors Classifier	0.783717	0.82062	0.846098	0.028452	None	None	None	None	None	distance	10	None	None	f1
KNeighbors Classifier	0.786199	0.819221	0.844209	0.0268835	None	None	None	None	None	distance	1	None	None	f1
KNeighbors Classifier	0.786199	0.819221	0.844209	0.0268835	None	None	None	None	None	distance	2	None	None	f1
KNeighbors Classifier	0.783526	0.817818	0.841952	0.0267682	None	None	None	None	None	distance	7	None	None	f1
KNeighbors Classifier	0.763222	0.80138	0.830066	0.0298958	None	None	None	None	None	uniform	5	None	None	f1
KNeighbors Classifier	0.746023	0.780867	0.805794	0.0270429	None	None	None	None	None	uniform	10	None	None	f1
KNeighbors Classifier	0.740549	0.773215	0.794326	0.0239986	None	None	None	None	None	uniform	6	None	None	f1
SVC	0.749606	0.774237	0.790083	0.0170524	None	None	10	None	None	None	None	rbf	0.001	f1
SVC	0.740733	0.752128	0.759614	0.00795577	None	None	1	None	None	None	None	rbf	0.001	f1
KNeighbors Classifier	0.714747	0.731159	0.744435	0.0129239	None	None	None	None	None	uniform	2	None	None	f1
SVC	0.736584	0.740878	0.74384	0.00292451	None	None	10	None	None	None	None	rbf	0.0001	f1
SVC	0.731079	0.736343	0.74005	0.00358838	None	None	1	None	None	None	None	linear	0.001	f1
SVC	0.731079	0.736343	0.74005	0.00358838	None	None	1	None	None	None	None	linear	0.0001	f1
SVC	0.731221	0.736332	0.739993	0.00351677	None	None	10	None	None	None	None	linear	0.001	f1
SVC	0.731221	0.736332	0.739993	0.00351677	None	None	10	None	None	None	None	linear	0.0001	f1
SVC	0.723292	0.729585	0.738085	0.00603122	None	None	1	None	None	None	None	rbf	0.0001	f1
Logistic Regression	0.727917	0.730152	0.732741	0.00166949	liblinear	l1	166.81	None	None	None	None	None	None	f1
Logistic Regression	0.727917	0.730152	0.732741	0.00166949	liblinear	l1	1291.55	None	None	None	None	None	None	f1
Logistic Regression	0.727917	0.730152	0.732741	0.00166949	liblinear	l1	464.159	None	None	None	None	None	None	f1
Logistic Regression	0.727917	0.730168	0.732741	0.0016802	liblinear	l1	21.5443	None	None	None	None	None	None	f1
Logistic Regression	0.727917	0.730124	0.732601	0.00162624	liblinear	l2	59.9484	None	None	None	None	None	None	f1
Logistic Regression	0.727917	0.730124	0.732601	0.00162624	liblinear	l2	1291.55	None	None	None	None	None	None	f1
Logistic Regression	0.727917	0.730112	0.732601	0.00164666	liblinear	l1	2.78256	None	None	None	None	None	None	f1
Logistic Regression	0.728058	0.730168	0.732601	0.00159982	liblinear	l2	1	None	None	None	None	None	None	f1
Logistic Regression	0.727917	0.730124	0.732601	0.00162624	liblinear	l2	7.74264	None	None	None	None	None	None	f1
Logistic Regression	0.727917	0.730096	0.73246	0.0015838	liblinear	l1	7.74264	None	None	None	None	None	None	f1
GradientBoostingClassifier	0.821468	0.925419	0.989282	0.076546	None	None	None	32	0.8	None	None	None	None	average_precision
GradientBoostingClassifier	0.822425	0.923258	0.988043	0.0783855	None	None	None	32	1	None	None	None	None	average_precision
RandomForestClassifier	0.830207	0.925652	0.984424	0.0713998	None	None	None	32	None	None	None	None	None	average_precision
ExtraTreesClassifier	0.861303	0.935199	0.983722	0.057306	None	None	None	32	None	None	None	None	None	average_precision
GradientBoostingClassifier	0.822112	0.920008	0.981603	0.07327	None	None	None	16	1	None	None	None	None	average_precision
GradientBoostingClassifier	0.818135	0.91826	0.98065	0.0756277	None	None	None	16	0.8	None	None	None	None	average_precision
RandomForestClassifier	0.821334	0.916648	0.978965	0.0759327	None	None	None	16	None	None	None	None	None	average_precision
ExtraTreesClassifier	0.843449	0.923981	0.975582	0.0619245	None	None	None	16	None	None	None	None	None	average_precision
KNeighbors Classifier	0.835026	0.902614	0.948428	0.051622	None	None	None	None	None	distance	7	None	None	average_precision
KNeighbors Classifier	0.833235	0.901778	0.948152	0.0518694	None	None	None	None	None	distance	6	None	None	average_precision
KNeighbors Classifier	0.829459	0.899275	0.94658	0.0526636	None	None	None	None	None	distance	5	None	None	average_precision
KNeighbors Classifier	0.837965	0.902901	0.94583	0.05023	None	None	None	None	None	distance	10	None	None	average_precision
KNeighbors Classifier	0.790807	0.862661	0.909165	0.0541569	None	None	None	None	None	uniform	6	None	None	average_precision
KNeighbors Classifier	0.794818	0.861745	0.909044	0.0529405	None	None	None	None	None	distance	2	None	None	average_precision
KNeighbors Classifier	0.787111	0.86051	0.908803	0.0551841	None	None	None	None	None	uniform	5	None	None	average_precision
KNeighbors Classifier	0.795598	0.864622	0.907848	0.0525226	None	None	None	None	None	uniform	10	None	None	average_precision
KNeighbors Classifier	0.766491	0.83616	0.885387	0.0550533	None	None	None	None	None	uniform	2	None	None	average_precision
SVC	0.743067	0.810492	0.856771	0.0545827	None	None	10	None	None	None	None	rbf	0.001	average_precision
KNeighbors Classifier	0.729899	0.795232	0.841468	0.0524177	None	None	None	None	None	distance	1	None	None	average_precision
SVC	0.73348	0.780625	0.811642	0.0361025	None	None	1	None	None	None	None	rbf	0.001	average_precision
SVC	0.733232	0.767801	0.790773	0.0256772	None	None	10	None	None	None	None	rbf	0.0001	average_precision
Logistic Regression	0.734844	0.766655	0.789745	0.0246688	liblinear	l2	1291.55	None	None	None	None	None	None	average_precision
Logistic Regression	0.734844	0.766655	0.789745	0.0246686	liblinear	l2	59.9484	None	None	None	None	None	None	average_precision
Logistic Regression	0.734845	0.766655	0.789745	0.0246678	liblinear	l2	7.74264	None	None	None	None	None	None	average_precision
Logistic Regression	0.734846	0.766654	0.789744	0.0246673	liblinear	l1	464.159	None	None	None	None	None	None	average_precision
Logistic Regression	0.734844	0.766655	0.789744	0.0246689	liblinear	l1	1291.55	None	None	None	None	None	None	average_precision
Logistic Regression	0.734842	0.766651	0.789741	0.0246661	liblinear	l1	21.5443	None	None	None	None	None	None	average_precision
Logistic Regression	0.734842	0.766654	0.78974	0.0246684	liblinear	l1	166.81	None	None	None	None	None	None	average_precision
Logistic Regression	0.734849	0.766651	0.789733	0.024661	liblinear	l2	1	None	None	None	None	None	None	average_precision
Logistic Regression	0.734847	0.76665	0.789729	0.0246631	liblinear	l1	7.74264	None	None	None	None	None	None	average_precision
Logistic Regression	0.734851	0.766648	0.789727	0.0246556	liblinear	l1	2.78256	None	None	None	None	None	None	average_precision
SVC	0.72901	0.761804	0.783525	0.0239841	None	None	1	None	None	None	None	linear	0.001	average_precision
SVC	0.72901	0.761804	0.783525	0.0239841	None	None	1	None	None	None	None	linear	0.0001	average_precision
SVC	0.72901	0.761799	0.783514	0.0239753	None	None	10	None	None	None	None	linear	0.001	average_precision
SVC	0.72901	0.761799	0.783514	0.0239753	None	None	10	None	None	None	None	linear	0.0001	average_precision
SVC	0.740792	0.756828	0.768692	0.0111599	None	None	1	None	None	None	None	rbf	0.0001	average_precision
GradientBoostingClassifier	0.844762	0.935319	0.989494	0.0652537	None	None	None	32	0.8	None	None	None	None	roc_auc
GradientBoostingClassifier	0.841358	0.932813	0.988391	0.0678729	None	None	None	32	1	None	None	None	None	roc_auc
RandomForestClassifier	0.866163	0.938915	0.983529	0.0540898	None	None	None	32	None	None	None	None	None	roc_auc
GradientBoostingClassifier	0.836426	0.927515	0.982439	0.0658201	None	None	None	16	1	None	None	None	None	roc_auc
GradientBoostingClassifier	0.841863	0.928377	0.981522	0.0645074	None	None	None	16	0.8	None	None	None	None	roc_auc
ExtraTreesClassifier	0.886582	0.944451	0.980996	0.0436843	None	None	None	32	None	None	None	None	None	roc_auc
RandomForestClassifier	0.854763	0.933021	0.980093	0.0570433	None	None	None	16	None	None	None	None	None	roc_auc
ExtraTreesClassifier	0.875501	0.937359	0.976016	0.0464029	None	None	None	16	None	None	None	None	None	roc_auc
KNeighbors Classifier	0.856341	0.909468	0.945598	0.0401991	None	None	None	None	None	distance	7	None	None	roc_auc
KNeighbors Classifier	0.855745	0.908887	0.945004	0.0402408	None	None	None	None	None	distance	6	None	None	roc_auc
KNeighbors Classifier	0.85551	0.908426	0.944924	0.0404559	None	None	None	None	None	distance	10	None	None	roc_auc
KNeighbors Classifier	0.8535	0.907225	0.943795	0.0405291	None	None	None	None	None	distance	5	None	None	roc_auc
KNeighbors Classifier	0.824911	0.884235	0.923133	0.0442313	None	None	None	None	None	uniform	5	None	None	roc_auc
KNeighbors Classifier	0.826423	0.884967	0.92293	0.0437568	None	None	None	None	None	uniform	6	None	None	roc_auc
KNeighbors Classifier	0.824606	0.883228	0.921104	0.0439922	None	None	None	None	None	uniform	10	None	None	roc_auc
KNeighbors Classifier	0.83299	0.879929	0.912891	0.0369488	None	None	None	None	None	distance	2	None	None	roc_auc
KNeighbors Classifier	0.817019	0.867459	0.902693	0.0395334	None	None	None	None	None	uniform	2	None	None	roc_auc
SVC	0.794536	0.834934	0.862862	0.0314465	None	None	10	None	None	None	None	rbf	0.001	roc_auc
KNeighbors Classifier	0.788983	0.830031	0.859729	0.0331258	None	None	None	None	None	distance	1	None	None	roc_auc
SVC	0.7908	0.810834	0.824674	0.0161005	None	None	1	None	None	None	None	rbf	0.001	roc_auc
SVC	0.787351	0.796275	0.802788	0.00670193	None	None	10	None	None	None	None	rbf	0.0001	roc_auc
SVC	0.781977	0.789644	0.795052	0.00533227	None	None	1	None	None	None	None	linear	0.001	roc_auc
SVC	0.781977	0.789644	0.795052	0.00533227	None	None	1	None	None	None	None	linear	0.0001	roc_auc
SVC	0.781982	0.789647	0.795043	0.0053243	None	None	10	None	None	None	None	linear	0.001	roc_auc
SVC	0.781982	0.789647	0.795043	0.0053243	None	None	10	None	None	None	None	linear	0.0001	roc_auc
SVC	0.773046	0.782242	0.794514	0.0092553	None	None	1	None	None	None	None	rbf	0.0001	roc_auc
Logistic Regression	0.784544	0.788452	0.791622	0.00307808	liblinear	l1	464.159	None	None	None	None	None	None	roc_auc
Logistic Regression	0.784542	0.788452	0.791621	0.00307939	liblinear	l2	1291.55	None	None	None	None	None	None	roc_auc
Logistic Regression	0.784542	0.788452	0.791621	0.00307925	liblinear	l2	59.9484	None	None	None	None	None	None	roc_auc
Logistic Regression	0.784546	0.78845	0.791621	0.00307679	liblinear	l1	1291.55	None	None	None	None	None	None	roc_auc
Logistic Regression	0.784544	0.788452	0.791621	0.0030783	liblinear	l2	7.74264	None	None	None	None	None	None	roc_auc
Logistic Regression	0.784549	0.788452	0.79162	0.00307553	liblinear	l1	21.5443	None	None	None	None	None	None	roc_auc
Logistic Regression	0.784548	0.788454	0.79162	0.00307769	liblinear	l1	166.81	None	None	None	None	None	None	roc_auc
Logistic Regression	0.784553	0.788453	0.791617	0.00307301	liblinear	l1	7.74264	None	None	None	None	None	None	roc_auc
Logistic Regression	0.784553	0.78845	0.791613	0.00306984	liblinear	l2	1	None	None	None	None	None	None	roc_auc
Logistic Regression	0.784553	0.788447	0.791605	0.00306442	liblinear	l1	2.78256	None	None	None	None	None	None	roc_auc
