# Supplementary figures and images for: Maize Feature Store: A centralized resource to manage and analyze curated maize multi-omics features for machine learning applications
Source: Oxford University Press journal article supplement (doi:10.1093/database/baad078), 2023-01-01

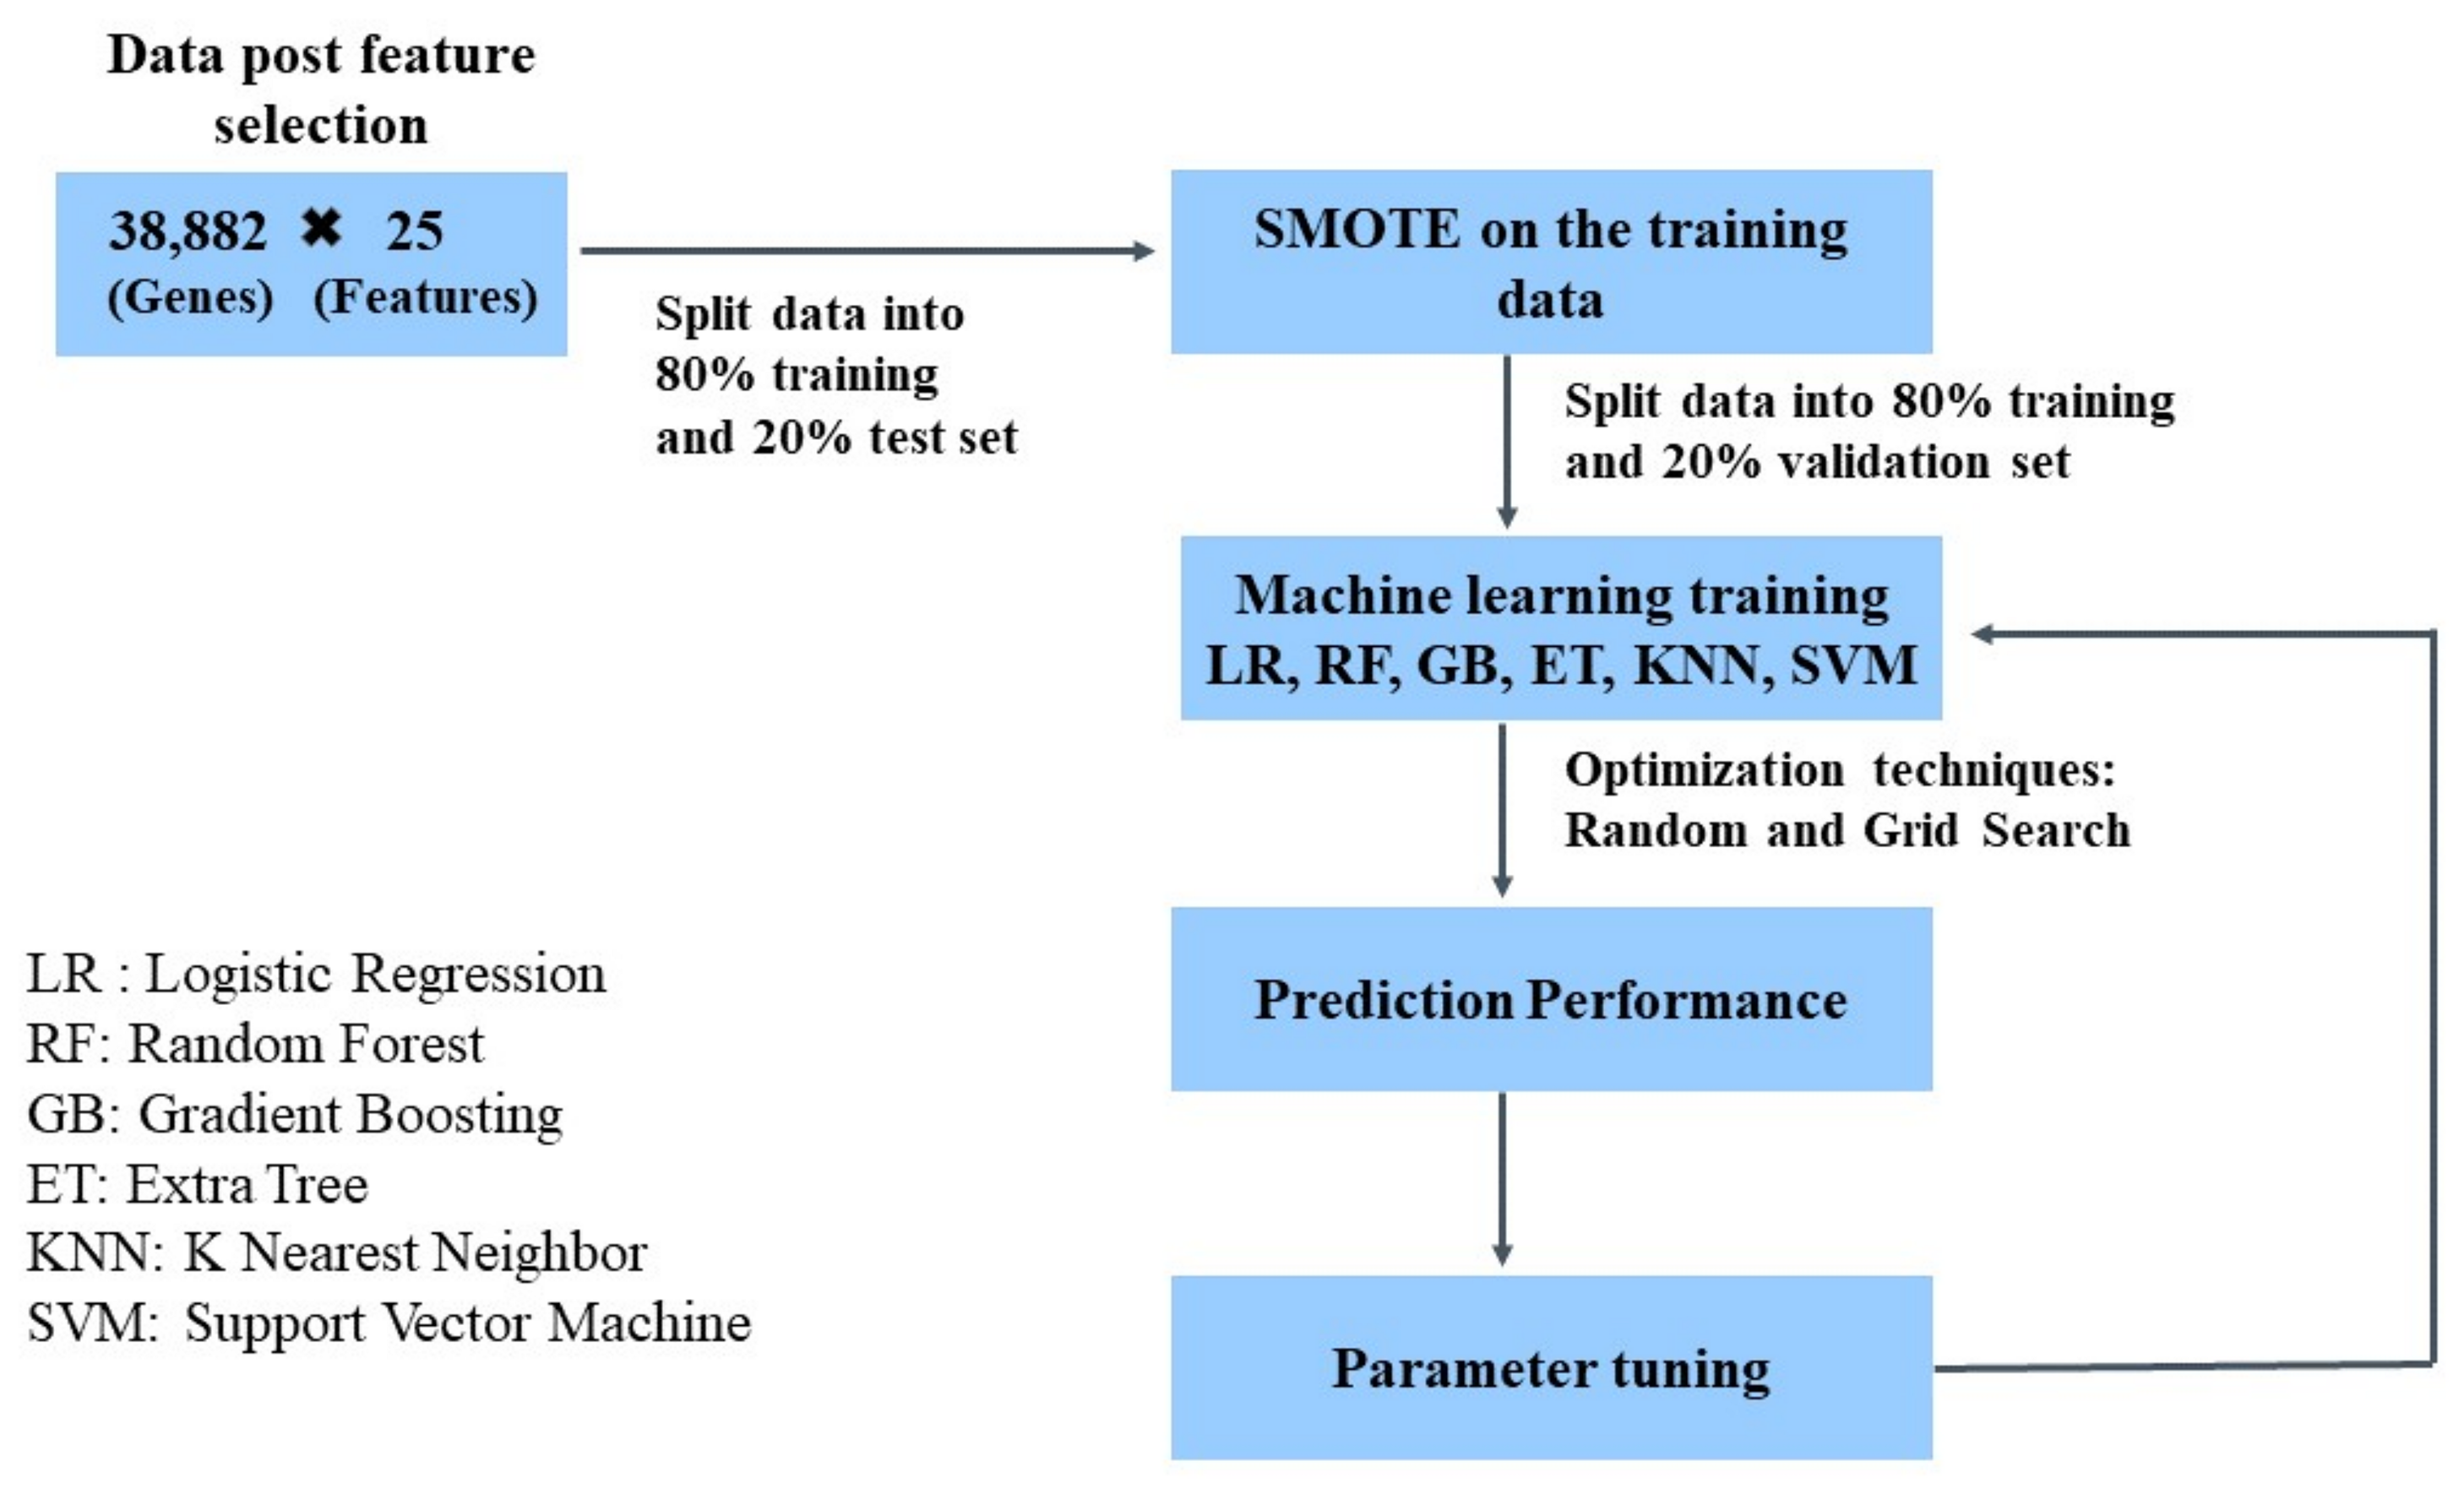

Supplement: baad078_supp.zip [file baad078_supp.zip › suppl_data/Supplementary_Figure_S19_Resized.png]
